# Supplementary material
Source: publisher site journal article supplement (https://www.spandidos-publications.com/3357/downloadSupplementary)
Supplement: Supplementary file 1 [file downloadSupplementary]

## Sheet: C0740457
Table SII. Prediction of the downstream regulatory transcription factors of MALAT1 in KIRC and KIRP through the lncMAP database.
Disease	Disease_id	Gene	Gene_id	UniProt	Gene_Full_Name	Protein_Class	N_diseases_g	DSI_g	DPI_g	pLI	Score_gda	EL_gda	EI_gda	N_PMIDs	N_SNPs_gda	First_Ref	Last_Ref
Malignant neoplasm of kidney	C0740457	VHL	7428	P40337	von Hippel-Lindau tumor suppressor	Enzyme	372	0.443	0.846	0.079515	0.7	strong	0.973	37	1	1995	2019
Malignant neoplasm of kidney	C0740457	FH	2271	P07954	fumarate hydratase	Enzyme	231	0.489	0.846	0.08824	0.6	strong	0.971	34	0	2002	2020
Malignant neoplasm of kidney	C0740457	FLCN	201163	Q8NFG4	folliculin		160	0.537	0.885	0.78892	0.6	strong	1	15	0	2002	2018
Malignant neoplasm of kidney	C0740457	BAP1	8314	Q92560	BRCA1 associated protein 1	Enzyme	299	0.454	0.731	0.99443	0.56		0.857	7	0	2013	2019
Malignant neoplasm of kidney	C0740457	PTEN	5728	P60484	phosphatase and tensin homolog	Enzyme	1349	0.305	0.923	0.25651	0.4	strong	1	11	0	1998	2019
Malignant neoplasm of kidney	C0740457	IL2	3558	P60568	interleukin 2		950	0.336	0.885	0.47968	0.4		1	17	0	1990	2019
Malignant neoplasm of kidney	C0740457	TP53	7157	P04637	tumor protein p53	Transcription factor	2494	0.236	0.962	0.53235	0.4		1	12	3	1993	2019
Malignant neoplasm of kidney	C0740457	MET	4233	P08581	MET proto-oncogene, receptor tyrosine kinase	Kinase	594	0.38	0.846	0.96998	0.39	strong	1	9	0	1997	2019
Malignant neoplasm of kidney	C0740457	SDHB	6390	P21912	succinate dehydrogenase complex iron sulfur subunit B	Enzyme	316	0.474	0.846	0.00024397	0.35	strong	1	5	0	2004	2017
Malignant neoplasm of kidney	C0740457	ABCB1	5243	P08183	ATP binding cassette subfamily B member 1	Transporter	933	0.344	0.885	1.2564e-05	0.34		1	5	1	1987	2012
Malignant neoplasm of kidney	C0740457	GSTT1	2952	P30711	glutathione S-transferase theta 1		541	0.393	0.923	0.00014834	0.34		1	5	0	1997	2018
Malignant neoplasm of kidney	C0740457	NDRG1	10397	Q92597	N-myc downstream regulated 1	Enzyme	225	0.488	0.731	0.011324	0.33		1	4	0	2002	2004
Malignant neoplasm of kidney	C0740457	CDKN1B	1027	P46527	cyclin dependent kinase inhibitor 1B		454	0.409	0.769	0.62376	0.33		1	4	0	2004	2018
Malignant neoplasm of kidney	C0740457	TSC2	7249	P49815	TSC complex subunit 2	Enzyme modulator	410	0.439	0.808	1	0.32		1	5	0	2001	2019
Malignant neoplasm of kidney	C0740457	TNFSF10	8743	P50591	TNF superfamily member 10	Signaling	445	0.413	0.885	0.13495	0.31		1	2	0	2006	2008
Malignant neoplasm of kidney	C0740457	NF2	4771	P35240	neurofibromin 2		312	0.468	0.885	1	0.31		1	1	0	2019	2019
Malignant neoplasm of kidney	C0740457	CCND1	595	P24385	cyclin D1	Enzyme modulator	859	0.344	0.923	0.89057	0.31		1	2	0	2011	2017
Malignant neoplasm of kidney	C0740457	PTGS2	5743	P35354	prostaglandin-endoperoxide synthase 2	Enzyme	1234	0.314	0.962	0.99597	0.31		1	2	0	2002	2017
Malignant neoplasm of kidney	C0740457	BRAF	673	P15056	B-Raf proto-oncogene, serine/threonine kinase	Kinase	1228	0.319	0.846	0.99995	0.31		1	2	0	2003	2011
Malignant neoplasm of kidney	C0740457	SOD2	6648	P04179	superoxide dismutase 2	Enzyme	668	0.379	0.923	0.15499	0.31		1	2	0	2014	2018
Malignant neoplasm of kidney	C0740457	MAPK3	5595	P27361	mitogen-activated protein kinase 3	Kinase	647	0.379	0.885	0.036884	0.31		1	2	0	2011	2017
Malignant neoplasm of kidney	C0740457	MAPK1	5594	P28482	mitogen-activated protein kinase 1	Kinase	1059	0.33	0.923	0.99698	0.31		1	2	0	2011	2019
Malignant neoplasm of kidney	C0740457	AXL	558	P30530	AXL receptor tyrosine kinase	Kinase	203	0.489	0.615	0.012951	0.31		1	2	0	2014	2017
Malignant neoplasm of kidney	C0740457	CYP1A1	1543	P04798	cytochrome P450 family 1 subfamily A member 1	Enzyme	379	0.436	0.846	1.0635e-17	0.31		1	2	0	2004	2011
Malignant neoplasm of kidney	C0740457	BRCA2	675	P51587	BRCA2 DNA repair associated	Nucleic acid binding	656	0.379	0.846	2.3581e-25	0.3			0	1
Malignant neoplasm of kidney	C0740457	HPGDS	27306	O60760	hematopoietic prostaglandin D synthase		570	0.388	0.923	1.8063e-06	0.3		1	1	0	2017	2017
Malignant neoplasm of kidney	C0740457	EIF4EBP1	1978	Q13541	eukaryotic translation initiation factor 4E binding protein 1	Nucleic acid binding	201	0.494	0.885	0.20762	0.3		1	1	0	2011	2011
Malignant neoplasm of kidney	C0740457	IL32	9235	P24001	interleukin 32		200	0.495	0.731	3.7471e-09	0.3		1	1	0	2014	2014
Malignant neoplasm of kidney	C0740457	RANBP1	5902	P43487	RAN binding protein 1	Enzyme modulator	18	0.736	0.615	0.82235	0.3		1	1	0	2017	2017
Malignant neoplasm of kidney	C0740457	RAF1	5894	P04049	Raf-1 proto-oncogene, serine/threonine kinase	Kinase	470	0.418	0.885	0.85295	0.3		1	1	0	2011	2011
Malignant neoplasm of kidney	C0740457	HAMP	57817	P81172	hepcidin antimicrobial peptide		377	0.433	0.846	0.0081797	0.3		1	1	0	2017	2017
Malignant neoplasm of kidney	C0740457	ESCO2	157570	Q56NI9	establishment of sister chromatid cohesion N-acetyltransferase 2		124	0.581	0.615	3.1642e-07	0.3		1	1	0	2017	2017
Malignant neoplasm of kidney	C0740457	TPH1	7166	P17752	tryptophan hydroxylase 1		127	0.553	0.731	3.1872e-07	0.3		1	1	0	2017	2017
Malignant neoplasm of kidney	C0740457	TPT1	7178	P13693	tumor protein, translationally-controlled 1	Cellular structure	143	0.528	0.731	0.80548	0.3		1	1	0	2017	2017
Malignant neoplasm of kidney	C0740457	DNM3	26052	Q9UQ16	dynamin 3	Enzyme modulator	48	0.716	0.462	0.0024197	0.3		1	1	0	2017	2017
Malignant neoplasm of kidney	C0740457	RASSF5	83593	Q8WWW0	Ras association domain family member 5	Enzyme modulator	45	0.641	0.577	0.043347	0.3		1	1	0	2014	2014
Malignant neoplasm of kidney	C0740457	BCOR	54880	Q6W2J9	BCL6 corepressor		314	0.471	0.808	1	0.3		1	1	0	2015	2015
Malignant neoplasm of kidney	C0740457	UBE2T	29089	Q9NPD8	ubiquitin conjugating enzyme E2 T		137	0.55	0.731	1.0599e-05	0.3		1	1	0	2017	2017
Malignant neoplasm of kidney	C0740457	FIGNL1	63979	Q6PIW4	fidgetin like 1	Cellular structure	23	0.805	0.385	0.00012046	0.3		1	1	0	2017	2017
Malignant neoplasm of kidney	C0740457	SLC5A5	6528	Q92911	solute carrier family 5 member 5	Transporter	195	0.499	0.769	0.0029492	0.3		1	1	0	2003	2003
Malignant neoplasm of kidney	C0740457	TNFRSF9	3604	Q07011	TNF receptor superfamily member 9		177	0.502	0.769	0.32153	0.3		1	1	0	2014	2014
Malignant neoplasm of kidney	C0740457	ATP7B	540	P35670	ATPase copper transporting beta	Transporter	182	0.529	0.654	4.8001e-30	0.3		1	1	0	2001	2001
Malignant neoplasm of kidney	C0740457	HLTF	6596	Q14527	helicase like transcription factor		70	0.606	0.5	1.8724e-28	0.3		1	1	0	2006	2006
Malignant neoplasm of kidney	C0740457	KYAT1	883	Q16773	kynurenine aminotransferase 1	Enzyme	24	0.736	0.308	1.8743e-12	0.3		1	1	0	2010	2010
Malignant neoplasm of kidney	C0740457	AURKA	6790	O14965	aurora kinase A	Kinase	245	0.475	0.731	0.8676	0.3		1	1	0	2008	2008
Malignant neoplasm of kidney	C0740457	TFE3	7030	P19532	transcription factor binding to IGHM enhancer 3		118	0.542	0.654	0.97985	0.1		1	12	0	2007	2018
Malignant neoplasm of kidney	C0740457	CD274	29126	Q9NZQ7	CD274 molecule	Receptor	1011	0.324	0.923	0.01916	0.1		1	11	0	2014	2020
Malignant neoplasm of kidney	C0740457	MIR21	406991		microRNA 21		726	0.363	0.846		0.1		1	12	0	2012	2020
Malignant neoplasm of kidney	C0740457	VEGFA	7422	P15692	vascular endothelial growth factor A	Signaling	1899	0.266	0.923	2.4085e-05	0.1		1	14	1	1999	2018
Malignant neoplasm of kidney	C0740457	EGFR	1956	P00533	epidermal growth factor receptor	Kinase	1394	0.295	0.885	0.36837	0.09		1	9	0	1988	2019
Malignant neoplasm of kidney	C0740457	EPAS1	2034	Q99814	endothelial PAS domain protein 1	Transcription factor	293	0.454	0.731	0.5961	0.08		1	8	0	2011	2019
Malignant neoplasm of kidney	C0740457	MTOR	2475	P42345	mechanistic target of rapamycin kinase	Kinase	960	0.343	0.885	1	0.08		1	8	0	2004	2019
Malignant neoplasm of kidney	C0740457	CTNNB1	1499	P35222	catenin beta 1		1368	0.303	0.885	0.99999	0.06		1	6	0	2000	2019
Malignant neoplasm of kidney	C0740457	HIF1A	3091	Q16665	hypoxia inducible factor 1 subunit alpha	Transcription factor	1044	0.327	0.923	0.9777	0.06		1	6	0	2005	2013
Malignant neoplasm of kidney	C0740457	LARP6	55323	Q9BRS8	La ribonucleoprotein 6, translational regulator	Nucleic acid binding	51	0.631	0.5	0.66874	0.06		1	6	0	2011	2019
Malignant neoplasm of kidney	C0740457	CXCR4	7852	P61073	C-X-C motif chemokine receptor 4	G-protein coupled receptor	739	0.362	0.923	0.017804	0.06		1	6	0	2002	2017
Malignant neoplasm of kidney	C0740457	MITF	4286	O75030	melanocyte inducing transcription factor		244	0.499	0.808	0.98119	0.06		1	6	0	2011	2019
Malignant neoplasm of kidney	C0740457	CTLA4	1493	P16410	cytotoxic T-lymphocyte associated protein 4		722	0.369	0.923	0.94085	0.05		0.8	5	0	2005	2019
Malignant neoplasm of kidney	C0740457	IL6	3569	P05231	interleukin 6		2367	0.248	0.962	0.31536	0.05		1	5	0	1992	2017
Malignant neoplasm of kidney	C0740457	TFEB	7942	P19484	transcription factor EB		150	0.527	0.731	0.89931	0.05		1	5	0	2012	2019
Malignant neoplasm of kidney	C0740457	SPOP	8405	O43791	speckle type BTB/POZ protein		72	0.597	0.5	0.99922	0.05		1	5	0	2009	2019
Malignant neoplasm of kidney	C0740457	PIK3CA	5290	P42336	phosphatidylinositol-4,5-bisphosphate 3-kinase catalytic subunit alpha	Kinase	1511	0.292	0.923	1	0.05		1	5	0	2007	2019
Malignant neoplasm of kidney	C0740457	PIK3CB	5291	P42338	phosphatidylinositol-4,5-bisphosphate 3-kinase catalytic subunit beta	Kinase	1083	0.322	0.885	0.99964	0.05		1	5	0	2007	2019
Malignant neoplasm of kidney	C0740457	PIK3CD	5293	O00329	phosphatidylinositol-4,5-bisphosphate 3-kinase catalytic subunit delta	Kinase	1119	0.319	0.885	0.99999	0.05		1	5	0	2007	2019
Malignant neoplasm of kidney	C0740457	PIK3CG	5294	P48736	phosphatidylinositol-4,5-bisphosphate 3-kinase catalytic subunit gamma	Kinase	1101	0.32	0.885	1.4076e-06	0.05		1	5	0	2007	2019
Malignant neoplasm of kidney	C0740457	CA9	768	Q16790	carbonic anhydrase 9		226	0.483	0.731	1.3027e-09	0.05		1	5	0	2001	2017
Malignant neoplasm of kidney	C0740457	MDM2	4193	Q00987	MDM2 proto-oncogene	Nucleic acid binding	702	0.362	0.846	0.99981	0.05		1	5	0	2005	2016
Malignant neoplasm of kidney	C0740457	BCL2	596	P10415	BCL2 apoptosis regulator	Signaling	1456	0.291	0.885	0.55903	0.04		1	4	0	2004	2015
Malignant neoplasm of kidney	C0740457	RASSF1	11186	Q9NS23	Ras association domain family member 1	Enzyme modulator	400	0.42	0.808	4.9255e-06	0.04		1	4	0	2002	2016
Malignant neoplasm of kidney	C0740457	GSTM1	2944	P09488	glutathione S-transferase mu 1		627	0.38	0.923	0.0020641	0.04		1	4	0	1997	2018
Malignant neoplasm of kidney	C0740457	PDCD1	5133	Q15116	programmed cell death 1		497	0.402	0.846	0.41706	0.04		1	4	0	2018	2019
Malignant neoplasm of kidney	C0740457	BHD	50947		Beukes familial hip dysplasia		31	0.678	0.385		0.04		1	4	0	2004	2010
Malignant neoplasm of kidney	C0740457	FBXW7	55294	Q969H0	F-box and WD repeat domain containing 7	Enzyme modulator	257	0.465	0.808	0.99949	0.04		1	4	0	2009	2017
Malignant neoplasm of kidney	C0740457	FHIT	2272	P49789	fragile histidine triad diadenosine triphosphatase		337	0.444	0.846	0.0057055	0.04		0.75	4	0	1997	2001
Malignant neoplasm of kidney	C0740457	RNF139	11236	Q8WU17	ring finger protein 139		36	0.67	0.423	0.53807	0.04		1	4	0	2002	2013
Malignant neoplasm of kidney	C0740457	CD44	960	P16070	CD44 molecule (Indian blood group)		711	0.363	0.962	2.4476e-07	0.04		1	4	0	1995	2019
Malignant neoplasm of kidney	C0740457	AKT1	207	P31749	AKT serine/threonine kinase 1	Kinase	1250	0.311	0.962	0.9759	0.04		1	4	0	2009	2019
Malignant neoplasm of kidney	C0740457	MALAT1	378938		metastasis associated lung adenocarcinoma transcript 1		336	0.435	0.846		0.04		1	4	0	2014	2018
Malignant neoplasm of kidney	C0740457	SARDH	1757	Q9UL12	sarcosine dehydrogenase	Enzyme	166	0.523	0.846	5.2689e-16	0.03		1	3	0	2005	2017
Malignant neoplasm of kidney	C0740457	HAVCR1	26762	Q96D42	hepatitis A virus cellular receptor 1		217	0.489	0.885	8.5105e-07	0.03		1	3	0	2014	2018
Malignant neoplasm of kidney	C0740457	TGFB1	7040	P01137	transforming growth factor beta 1	Signaling	1558	0.287	0.962	0.03685	0.03		1	3	0	1992	2018
Malignant neoplasm of kidney	C0740457	CSF2	1437	P04141	colony stimulating factor 2	Signaling	1028	0.33	0.962	0.83468	0.03		1	3	0	2000	2003
Malignant neoplasm of kidney	C0740457	IFNA1	3439	P01562	interferon alpha 1		662	0.371	0.923		0.03		1	3	0	1994	2011
Malignant neoplasm of kidney	C0740457	TNF	7124	P01375	tumor necrosis factor	Signaling	2724	0.231	0.962	0.8033	0.03		0.667	3	0	1992	2015
Malignant neoplasm of kidney	C0740457	TBC1D9	23158	Q6ZT07	TBC1 domain family member 9	Enzyme	491	0.399	0.846	2.8039e-05	0.03		1	3	0	1987	2012
Malignant neoplasm of kidney	C0740457	CYP1B1	1545	Q16678	cytochrome P450 family 1 subfamily B member 1	Enzyme	304	0.457	0.769	2.2024e-05	0.03		1	3	1	2004	2014
Malignant neoplasm of kidney	C0740457	SETD2	29072	Q9BYW2	SET domain containing 2, histone lysine methyltransferase	Epigenetic regulator	447	0.424	0.846	1	0.03		1	3	0	2011	2015
Malignant neoplasm of kidney	C0740457	GABPA	2551	Q06546	GA binding protein transcription factor subunit alpha	Transcription factor	632	0.379	0.885	0.99812	0.03		1	3	0	2017	2020
Malignant neoplasm of kidney	C0740457	JADE1	79960	Q6IE81	jade family PHD finger 1	Transcription factor	18	0.743	0.308	0.99885	0.03		1	3	0	2004	2019
Malignant neoplasm of kidney	C0740457	SORD	6652	Q00796	sorbitol dehydrogenase	Enzyme	113	0.552	0.769	4.4938e-08	0.03		1	3	0	2005	2017
Malignant neoplasm of kidney	C0740457	MIR122	406906		microRNA 122		250	0.468	0.808		0.03		1	3	0	2013	2019
Malignant neoplasm of kidney	C0740457	AMER1	139285	Q5JTC6	APC membrane recruitment protein 1		134	0.57	0.654	0.8538	0.03		1	3	0	2014	2018
Malignant neoplasm of kidney	C0740457	SDS	10993	P20132	serine dehydratase	Enzyme	139	0.534	0.769	0.00013923	0.03		1	3	0	2005	2017
Malignant neoplasm of kidney	C0740457	RALBP1	10928	Q15311	ralA binding protein 1	Enzyme modulator	134	0.536	0.654	0.14667	0.03		1	3	0	2009	2011
Malignant neoplasm of kidney	C0740457	CXCL12	6387	P48061	C-X-C motif chemokine ligand 12		626	0.379	0.846	0.11851	0.03		0.667	3	0	2002	2016
Malignant neoplasm of kidney	C0740457	KDR	3791	P35968	kinase insert domain receptor	Kinase	623	0.378	0.885	0.99982	0.03		1	3	0	2015	2015
Malignant neoplasm of kidney	C0740457	MIR183	406959		microRNA 183		190	0.494	0.885		0.03		1	3	0	2014	2019
Malignant neoplasm of kidney	C0740457	NFE2L2	4780	Q16236	nuclear factor, erythroid 2 like 2	Enzyme	823	0.357	0.885	0.0035719	0.03		1	3	1	2017	2020
Malignant neoplasm of kidney	C0740457	MMP2	4313	P08253	matrix metallopeptidase 2	Enzyme	1021	0.333	0.923	0.83878	0.03		1	3	0	1997	2015
Malignant neoplasm of kidney	C0740457	ACKR3	57007	P25106	atypical chemokine receptor 3	G-protein coupled receptor	400	0.428	0.885	0.39134	0.03		1	3	0	2010	2017
Malignant neoplasm of kidney	C0740457	MIR210	406992		microRNA 210		277	0.46	0.846		0.03		1	3	0	2010	2013
Malignant neoplasm of kidney	C0740457	IFNA13	3447	P01562	interferon alpha 13		646	0.374	0.923		0.03		1	3	0	1994	2011
Malignant neoplasm of kidney	C0740457	CAV1	857	Q03135	caveolin 1	Enzyme modulator	633	0.388	0.885	0.008274	0.03		1	3	0	2011	2017
Malignant neoplasm of kidney	C0740457	FNIP2	57600	Q9P278	folliculin interacting protein 2		15	0.76	0.231	1	0.03		1	3	0	2013	2017
Malignant neoplasm of kidney	C0740457	PBRM1	55193	Q86U86	polybromo 1	Epigenetic regulator	105	0.566	0.615	1	0.03		1	3	0	2013	2019
Malignant neoplasm of kidney	C0740457	KDM3A	55818	Q9Y4C1	lysine demethylase 3A	Epigenetic regulator	77	0.599	0.654	0.99999	0.02		1	2	0	2011	2012
Malignant neoplasm of kidney	C0740457	AMACR	23600	Q9UHK6	alpha-methylacyl-CoA racemase		179	0.51	0.769	0.027363	0.02		1	2	0	2003	2009
Malignant neoplasm of kidney	C0740457	MAP1LC3C	440738	Q9BXW4	microtubule associated protein 1 light chain 3 gamma		13	0.792	0.385	5.8124e-06	0.02		1	2	0	2012	2015
Malignant neoplasm of kidney	C0740457	SMUG1	23583	Q53HV7	single-strand-selective monofunctional uracil-DNA glycosylase 1		1034	0.322	0.923	0.00045154	0.02		1	2	0	2018	2019
Malignant neoplasm of kidney	C0740457	MMP1	4312	P03956	matrix metallopeptidase 1	Enzyme	589	0.385	0.885	7.7197e-18	0.02		1	2	0	2008	2010
Malignant neoplasm of kidney	C0740457	FOLH1	2346	Q04609	folate hydrolase 1	Enzyme	311	0.453	0.885	6.1977e-09	0.02		0.5	2	0	1999	2000
Malignant neoplasm of kidney	C0740457	TGFA	7039	P01135	transforming growth factor alpha	Signaling	376	0.432	0.885	0.71981	0.02		1	2	0	2008	2009
Malignant neoplasm of kidney	C0740457	PIK3R1	5295	P27986	phosphoinositide-3-kinase regulatory subunit 1	Kinase	285	0.477	0.885	0.99978	0.02		1	2	0	2017	2018
Malignant neoplasm of kidney	C0740457	PKM	5315	P14618	pyruvate kinase M1/2	Kinase	237	0.482	0.808	0.8549	0.02		1	2	0	2019	2019
Malignant neoplasm of kidney	C0740457	DKK1	22943	O94907	dickkopf WNT signaling pathway inhibitor 1		372	0.439	0.885	0.17423	0.02		1	2	0	2007	2011
Malignant neoplasm of kidney	C0740457	DUXAP8	503637		double homeobox A pseudogene 8		24	0.7	0.269		0.02		1	2	0	2018	2019
Malignant neoplasm of kidney	C0740457	NME1	4830	P15531	NME/NM23 nucleoside diphosphate kinase 1	Kinase	329	0.443	0.808	0.0031764	0.02		1	2	0	1994	1995
Malignant neoplasm of kidney	C0740457	KDM6B	23135	O15054	lysine demethylase 6B	Epigenetic regulator	173	0.514	0.808	1	0.02		1	2	0	2016	2017
Malignant neoplasm of kidney	C0740457	B2M	567	P61769	beta-2-microglobulin	Immune response	352	0.447	0.846	0.56167	0.02		1	2	0	1992	2013
Malignant neoplasm of kidney	C0740457	MYC	4609	P01106	MYC proto-oncogene, bHLH transcription factor	Transcription factor	821	0.344	0.923	0.99801	0.02		1	2	0	1987	2016
Malignant neoplasm of kidney	C0740457	FN1	2335	P02751	fibronectin 1	Signaling	724	0.365	0.962	0.0014045	0.02		1	2	0	2010	2014
Malignant neoplasm of kidney	C0740457	VIM	7431	P08670	vimentin		644	0.372	0.846	0.71255	0.02		1	2	0	1999	2019
Malignant neoplasm of kidney	C0740457	MCAM	4162	P43121	melanoma cell adhesion molecule	Cell adhesion	169	0.514	0.731	0.00015954	0.02		1	2	0	2006	2013
Malignant neoplasm of kidney	C0740457	VDR	7421	P11473	vitamin D receptor	Nuclear receptor	852	0.352	0.885	1.6787e-05	0.02		1	2	0	2008	2014
Malignant neoplasm of kidney	C0740457	EPCAM	4072	P16422	epithelial cell adhesion molecule		328	0.451	0.885	1.2844e-07	0.02		1	2	0	2017	2020
Malignant neoplasm of kidney	C0740457	TCF21	6943	O43680	transcription factor 21		143	0.537	0.692	0.82553	0.02		1	2	0	2012	2018
Malignant neoplasm of kidney	C0740457	SFRP1	6422	Q8N474	secreted frizzled related protein 1		227	0.479	0.846	0.96457	0.02		1	2	0	2007	2012
Malignant neoplasm of kidney	C0740457	IL10	3586	P22301	interleukin 10		1679	0.281	0.923	0.0058874	0.02		1	2	0	1995	2005
Malignant neoplasm of kidney	C0740457	IL4	3565	P05112	interleukin 4		996	0.332	0.962	0.0047372	0.02		1	2	1	2012	2013
Malignant neoplasm of kidney	C0740457	KLK3	354	P07288	kallikrein related peptidase 3	Enzyme	358	0.443	0.885	4.4271e-06	0.02		1	2	0	2004	2019
Malignant neoplasm of kidney	C0740457	HSF1	3297	Q00613	heat shock transcription factor 1	Transcription factor	185	0.507	0.769	0.74762	0.02		1	2	0	2012	2015
Malignant neoplasm of kidney	C0740457	HNF4A	3172	P41235	hepatocyte nuclear factor 4 alpha	Nuclear receptor	340	0.461	0.808	0.15285	0.02		1	2	0	2008	2013
Malignant neoplasm of kidney	C0740457	STAT3	6774	P40763	signal transducer and activator of transcription 3	Nucleic acid binding	1193	0.32	0.923	1	0.02		1	2	0	2013	2014
Malignant neoplasm of kidney	C0740457	S100A8	6279	P05109	S100 calcium binding protein A8	Calcium-binding protein	369	0.43	0.962	0.13761	0.02		1	2	0	2014	2015
Malignant neoplasm of kidney	C0740457	LGALS3	3958	P17931	galectin 3	Signaling	557	0.392	0.846	2.3207e-05	0.02		1	2	0	2016	2017
Malignant neoplasm of kidney	C0740457	PDCD4	27250	Q53EL6	programmed cell death 4	Nucleic acid binding	198	0.494	0.769	3.3572e-07	0.02		1	2	0	2014	2017
Malignant neoplasm of kidney	C0740457	MIR27A	407018		microRNA 27a		248	0.466	0.846		0.02		1	2	0	2012	2014
Malignant neoplasm of kidney	C0740457	MIR23B	407011		microRNA 23b		137	0.523	0.808		0.02		1	2	0	2010	2012
Malignant neoplasm of kidney	C0740457	REN	5972	P00797	renin	Enzyme	721	0.37	0.923	2.4297e-07	0.02		1	2	0	2015	2017
Malignant neoplasm of kidney	C0740457	RAP1GAP	5909	P47736	RAP1 GTPase activating protein	Enzyme modulator	63	0.626	0.5	0.84376	0.02		1	2	0	2011	2012
Malignant neoplasm of kidney	C0740457	MIR182	406958		microRNA 182		211	0.486	0.846		0.02		1	2	0	2018	2018
Malignant neoplasm of kidney	C0740457	SOSTDC1	25928	Q6X4U4	sclerostin domain containing 1		83	0.588	0.808	0.16334	0.02		1	2	0	2010	2019
Malignant neoplasm of kidney	C0740457	DKK3	27122	Q9UBP4	dickkopf WNT signaling pathway inhibitor 3		186	0.5	0.731	4.1049e-06	0.02		1	2	0	2011	2017
Malignant neoplasm of kidney	C0740457	MIR106B	406900		microRNA 106b		143	0.523	0.808		0.02		1	2	0	2016	2017
Malignant neoplasm of kidney	C0740457	IL16	3603	Q14005	interleukin 16	Signaling	193	0.501	0.846	1.2449e-10	0.02		1	2	1	2015	2016
Malignant neoplasm of kidney	C0740457	SLC16A3	9123	O15427	solute carrier family 16 member 3	Transporter	122	0.542	0.731	0.00029385	0.02		1	2	0	2013	2019
Malignant neoplasm of kidney	C0740457	COPS5	10987	Q92905	COP9 signalosome subunit 5	Enzyme	101	0.566	0.769	0.99925	0.02		1	2	0	2002	2005
Malignant neoplasm of kidney	C0740457	ZBTB7C	201501	A1YPR0	zinc finger and BTB domain containing 7C		39	0.691	0.577	0.16087	0.02		1	2	0	2012	2017
Malignant neoplasm of kidney	C0740457	CDKN1A	1026	P38936	cyclin dependent kinase inhibitor 1A		490	0.403	0.769	0.0018575	0.02		1	2	0	1997	2017
Malignant neoplasm of kidney	C0740457	PLIN2	123	Q99541	perilipin 2	Transporter	100	0.564	0.692	7.5281e-09	0.02		1	2	0	2017	2019
Malignant neoplasm of kidney	C0740457	CASP1	834	P29466	caspase 1	Enzyme	444	0.413	0.885	3.5183e-05	0.02		1	2	0	2001	2009
Malignant neoplasm of kidney	C0740457	AGER	177	Q15109	advanced glycosylation end-product specific receptor	Receptor	450	0.42	0.885	6.3528e-16	0.02		1	2	0	2010	2015
Malignant neoplasm of kidney	C0740457	COMT	1312	P21964	catechol-O-methyltransferase	Enzyme	622	0.4	0.923	1.1377e-06	0.02		0.5	2	1	2007	2016
Malignant neoplasm of kidney	C0740457	TCHP	84260	Q9BT92	trichoplein keratin filament binding		90	0.57	0.692	1.8026e-16	0.02		1	2	0	2013	2019
Malignant neoplasm of kidney	C0740457	DIO1	1733	P49895	iodothyronine deiodinase 1		51	0.638	0.769	0.58399	0.02		1	2	0	2009	2017
Malignant neoplasm of kidney	C0740457	SLC16A4	9122	O15374	solute carrier family 16 member 4	Transporter	114	0.55	0.731	9.6707e-08	0.02		1	2	0	2013	2019
Malignant neoplasm of kidney	C0740457	CLOCK	9575	O15516	clock circadian regulator		309	0.463	0.885	0.99957	0.02		1	2	0	2012	2014
Malignant neoplasm of kidney	C0740457	CDKN2A	1029	P42771;Q8N726	cyclin dependent kinase inhibitor 2A		1314	0.3	0.885	0.39474	0.02		1	2	0	2004	2007
Malignant neoplasm of kidney	C0740457	VCAN	1462	P13611	versican	Extracellular structure	205	0.497	0.808	1	0.02		1	2	0	2017	2019
Malignant neoplasm of kidney	C0740457	ALB	213	P02768	albumin	Transporter	1198	0.317	0.962	0.64329	0.02		1	2	0	2018	2018
Malignant neoplasm of kidney	C0740457	MYBBP1A	10514	Q9BQG0	MYB binding protein 1a	Enzyme	31	0.695	0.615	5.2346e-42	0.02		1	2	0	2019	2019
Malignant neoplasm of kidney	C0740457	TMEM106A	113277	Q96A25	transmembrane protein 106A		11	0.839	0.192	1.8357e-07	0.02		1	2	0	2017	2018
Malignant neoplasm of kidney	C0740457	CEACAM5	1048	P06731	CEA cell adhesion molecule 5		428	0.42	0.846	4.1625e-10	0.02		1	2	0	2017	2018
Malignant neoplasm of kidney	C0740457	DLEC1	9940	Q9Y238	DLEC1 cilia and flagella associated protein		94	0.572	0.615	2.1303e-35	0.02		1	2	0	2007	2010
Malignant neoplasm of kidney	C0740457	KL	9365	Q9UEF7	klotho	Enzyme	332	0.448	0.769	0.00022444	0.02		1	2	0	2018	2019
Malignant neoplasm of kidney	C0740457	CLU	1191	P10909	clusterin		412	0.426	0.885	7.8072e-05	0.02		1	2	0	2001	2014
Malignant neoplasm of kidney	C0740457	CDH6	1004	P55285	cadherin 6		32	0.691	0.385	0.91966	0.02		1	2	0	2005	2017
Malignant neoplasm of kidney	C0740457	SQSTM1	8878	Q13501	sequestosome 1		470	0.428	0.885	0.00086035	0.02		1	2	0	2013	2020
Malignant neoplasm of kidney	C0740457	EPO	2056	P01588	erythropoietin		646	0.381	0.885	0.01125	0.02		1	2	0	1990	2002
Malignant neoplasm of kidney	C0740457	PROM1	8842	O43490	prominin 1	Transporter	477	0.41	0.846	1.9485e-22	0.02		1	2	0	2005	2010
Malignant neoplasm of kidney	C0740457	CBFA2T2	9139	O43439	CBFA2/RUNX1 partner transcriptional co-repressor 2	Transcription factor	64	0.615	0.654	0.99585	0.01		1	1	0	2018	2018
Malignant neoplasm of kidney	C0740457	DERL3	91319	Q96Q80	derlin 3	Receptor	32	0.691	0.462	0.000219	0.01		1	1	0	1988	1988
Malignant neoplasm of kidney	C0740457	PVT1	5820		Pvt1 oncogene		190	0.495	0.731		0.01		1	1	0	2016	2016
Malignant neoplasm of kidney	C0740457	MIR146B	574447		microRNA 146b		187	0.496	0.769		0.01		1	1	0	2018	2018
Malignant neoplasm of kidney	C0740457	BBS2	583	Q9BXC9	Bardet-Biedl syndrome 2		128	0.565	0.654	1.0328e-17	0.01		1	1	0	2000	2000
Malignant neoplasm of kidney	C0740457	KLF4	9314	O43474	Kruppel like factor 4	Nucleic acid binding	307	0.449	0.769	0.99714	0.01		1	1	0	2013	2013
Malignant neoplasm of kidney	C0740457	CXCL16	58191	Q9H2A7	C-X-C motif chemokine ligand 16	Signaling	178	0.502	0.769	3.4546e-05	0.01		1	1	0	2009	2009
Malignant neoplasm of kidney	C0740457	PTTG1	9232	O95997	PTTG1 regulator of sister chromatid separation, securin		140	0.526	0.654	0.00042161	0.01		1	1	0	2017	2017
Malignant neoplasm of kidney	C0740457	MIR497	574456		microRNA 497		116	0.539	0.808		0.01		1	1	0	2015	2015
Malignant neoplasm of kidney	C0740457	PANX2	56666	Q96RD6	pannexin 2	Ion channel	14	0.736	0.5	4.4188e-06	0.01		1	1	0	2019	2019
Malignant neoplasm of kidney	C0740457	MIR494	574452		microRNA 494		131	0.531	0.692		0.01		1	1	0	2016	2016
Malignant neoplasm of kidney	C0740457	NDRG2	57447	Q9UN36	NDRG family member 2	Enzyme	156	0.518	0.692	2.2044e-05	0.01		1	1	0	2015	2015
Malignant neoplasm of kidney	C0740457	MIR510	574515		microRNA 510		32	0.678	0.423		0.01		1	1	0	2015	2015
Malignant neoplasm of kidney	C0740457	MTA2	9219	O94776	metastasis associated 1 family member 2	Nucleic acid binding	93	0.579	0.808	0.74479	0.01		1	1	0	2019	2019
Malignant neoplasm of kidney	C0740457	DCLK1	9201	O15075	doublecortin like kinase 1	Kinase	123	0.545	0.615	0.99964	0.01		1	1	0	2018	2018
Malignant neoplasm of kidney	C0740457	EPB41L5	57669	Q9HCM4	erythrocyte membrane protein band 4.1 like 5		16	0.78	0.346	0.020795	0.01		1	1	0	2016	2016
Malignant neoplasm of kidney	C0740457	CHRDL1	91851	Q9BU40	chordin like 1		41	0.659	0.538	0.2164	0.01		1	1	0	2019	2019
Malignant neoplasm of kidney	C0740457	PYCR1	5831	P32322	pyrroline-5-carboxylate reductase 1		126	0.57	0.654	0.00019947	0.01		1	1	0	2016	2016
Malignant neoplasm of kidney	C0740457	RAB27B	5874	O00194	RAB27B, member RAS oncogene family		64	0.608	0.692	0.038714	0.01		1	1	0	2012	2012
Malignant neoplasm of kidney	C0740457	MBD2	8932	Q9UBB5	methyl-CpG binding domain protein 2	Epigenetic regulator	256	0.466	0.846	0.34957	0.01		1	1	0	2014	2014
Malignant neoplasm of kidney	C0740457	ROBO1	6091	Q9Y6N7	roundabout guidance receptor 1		144	0.535	0.731	7.2696e-16	0.01		1	1	0	2002	2002
Malignant neoplasm of kidney	C0740457	KRIT1	889	O00522	KRIT1 ankyrin repeat containing		201	0.5	0.808	0.00069333	0.01		1	1	0	2011	2011
Malignant neoplasm of kidney	C0740457	CCL2	6347	P13500	C-C motif chemokine ligand 2	Signaling	1157	0.321	0.962	0.60786	0.01		1	1	0	2015	2015
Malignant neoplasm of kidney	C0740457	ROCK1	6093	Q13464	Rho associated coiled-coil containing protein kinase 1	Kinase	157	0.513	0.731	1	0.01		1	1	0	2016	2016
Malignant neoplasm of kidney	C0740457	RORA	6095	P35398	RAR related orphan receptor A	Nuclear receptor	158	0.533	0.808	0.40096	0.01		1	1	0	2019	2019
Malignant neoplasm of kidney	C0740457	RPL17	6139	P18621	ribosomal protein L17		104	0.559	0.731	0.92412	0.01		1	1	0	2019	2019
Malignant neoplasm of kidney	C0740457	MIR455	619556		microRNA 455		92	0.559	0.769		0.01		1	1	0	2017	2017
Malignant neoplasm of kidney	C0740457	RPS15A	6210	P62244	ribosomal protein S15a	Nucleic acid binding	58	0.638	0.538	0.802	0.01		1	1	0	2019	2019
Malignant neoplasm of kidney	C0740457	S100A1	6271	P23297	S100 calcium binding protein A1	Calcium-binding protein	396	0.421	0.846	0.0060044	0.01		0	1	0	2004	2004
Malignant neoplasm of kidney	C0740457	SPHK1	8877	Q9NYA1	sphingosine kinase 1	Kinase	236	0.48	0.808	3.0327e-07	0.01		1	1	0	2009	2009
Malignant neoplasm of kidney	C0740457	RHEB	6009	Q15382	Ras homolog, mTORC1 binding	Enzyme modulator	53	0.631	0.577	0.98119	0.01		1	1	0	2015	2015
Malignant neoplasm of kidney	C0740457	ACTB	60	P60709	actin beta	Cellular structure	1110	0.325	0.923	0.98564	0.01		1	1	0	2013	2013
Malignant neoplasm of kidney	C0740457	MOK	5891	Q9UQ07	MOK protein kinase	Kinase	251	0.476	0.769	8.8397e-22	0.01		1	1	0	2010	2010
Malignant neoplasm of kidney	C0740457	LATS1	9113	O95835	large tumor suppressor kinase 1	Kinase	99	0.563	0.731	0.99987	0.01		1	1	0	2014	2014
Malignant neoplasm of kidney	C0740457	RGN	9104	Q15493	regucalcin	Enzyme	96	0.566	0.692	0.022123	0.01		1	1	0	2019	2019
Malignant neoplasm of kidney	C0740457	STARD13	90627	Q9Y3M8	StAR related lipid transfer domain containing 13		60	0.641	0.538	2.3524e-08	0.01		1	1	0	2019	2019
Malignant neoplasm of kidney	C0740457	CCNG2	901	Q16589	cyclin G2	Enzyme modulator	59	0.615	0.577	0.0096861	0.01		1	1	0	2014	2014
Malignant neoplasm of kidney	C0740457	SELENBP1	8991	Q13228	selenium binding protein 1	Immune response	214	0.493	0.846	3.2268e-16	0.01		1	1	0	2017	2017
Malignant neoplasm of kidney	C0740457	ATG16L2	89849	Q8NAA4	autophagy related 16 like 2		12	0.769	0.462	4.6874e-16	0.01		1	1	0	2015	2015
Malignant neoplasm of kidney	C0740457	RCN1	5954	Q15293	reticulocalbin 1	Calcium-binding protein	30	0.711	0.5	2.8821e-05	0.01		0	1	0	2004	2004
Malignant neoplasm of kidney	C0740457	TOP3B	8940	O95985	DNA topoisomerase III beta	Enzyme	14	0.769	0.269	0.00021389	0.01		1	1	0	2019	2019
Malignant neoplasm of kidney	C0740457	RELA	5970	Q04206	RELA proto-oncogene, NF-kB subunit	Transcription factor	483	0.406	0.885	0.99948	0.01		1	1	0	2019	2019
Malignant neoplasm of kidney	C0740457	CCND2	894	P30279	cyclin D2	Enzyme modulator	241	0.477	0.808	0.98658	0.01		1	1	0	2016	2016
Malignant neoplasm of kidney	C0740457	S100B	6285	P04271	S100 calcium binding protein B	Calcium-binding protein	599	0.383	0.923	0.04387	0.01		0	1	0	2004	2004
Malignant neoplasm of kidney	C0740457	PKD1	5310	P98161	polycystin 1, transient receptor potential channel interacting		217	0.493	0.769	1	0.01		1	1	0	2016	2016
Malignant neoplasm of kidney	C0740457	ACYP2	98	P14621	acylphosphatase 2	Enzyme	42	0.659	0.577	6.5331e-05	0.01		1	1	0	2019	2019
Malignant neoplasm of kidney	C0740457	MKS1	54903	Q9NXB0	MKS transition zone complex subunit 1	Extracellular structure	231	0.505	0.769	3.3768e-16	0.01		1	1	0	2018	2018
Malignant neoplasm of kidney	C0740457	PINX1	54984	Q96BK5	PIN2 (TERF1) interacting telomerase inhibitor 1	Enzyme modulator	88	0.587	0.692	4.5977e-09	0.01		1	1	0	2019	2019
Malignant neoplasm of kidney	C0740457	TESC	54997	Q96BS2	tescalcin		97	0.57	0.692	0.10778	0.01		1	1	0	2002	2002
Malignant neoplasm of kidney	C0740457	TMEM45A	55076	Q9NWC5	transmembrane protein 45A		20	0.736	0.308	0.0047645	0.01		1	1	0	2019	2019
Malignant neoplasm of kidney	C0740457	AVP	551	P01185	arginine vasopressin	Signaling	454	0.437	0.846	0.074413	0.01		1	1	0	2018	2018
Malignant neoplasm of kidney	C0740457	MAML1	9794	Q92585	mastermind like transcriptional coactivator 1	Transcription factor	38	0.67	0.423	0.99995	0.01		1	1	0	2012	2012
Malignant neoplasm of kidney	C0740457	PCLAF	9768	Q15004	PCNA clamp associated factor		125	0.538	0.769	0.16276	0.01		1	1	0	2014	2014
Malignant neoplasm of kidney	C0740457	CD74	972	P04233	CD74 molecule	Enzyme modulator	170	0.512	0.808	0.24889	0.01		1	1	0	2019	2019
Malignant neoplasm of kidney	C0740457	FNIP1	96459	Q8TF40	folliculin interacting protein 1		24	0.743	0.346	0.99957	0.01		1	1	0	2013	2013
Malignant neoplasm of kidney	C0740457	MIR429	554210		microRNA 429		117	0.544	0.731		0.01		1	1	0	2019	2019
Malignant neoplasm of kidney	C0740457	SUPT20H	55578	Q8NEM7	SPT20 homolog, SAGA complex component	Transcription factor	18	0.751	0.346	2.7313e-14	0.01		1	1	0	2005	2005
Malignant neoplasm of kidney	C0740457	ERCC6L	54821	Q2NKX8	ERCC excision repair 6 like, spindle assembly checkpoint helicase		20	0.743	0.385	0.99932	0.01		1	1	0	2017	2017
Malignant neoplasm of kidney	C0740457	PPP1R12C	54776	Q9BZL4	protein phosphatase 1 regulatory subunit 12C		53	0.626	0.654	0.086713	0.01		1	1	0	2018	2018
Malignant neoplasm of kidney	C0740457	CDC42	998	P60953	cell division cycle 42	Enzyme modulator	327	0.458	0.846	0.78728	0.01		1	1	0	2013	2013
Malignant neoplasm of kidney	C0740457	RBX1	9978	P62877	ring-box 1	Enzyme	63	0.601	0.615	0.94689	0.01		1	1	0	2020	2020
Malignant neoplasm of kidney	C0740457	NR1D2	9975	Q14995	nuclear receptor subfamily 1 group D member 2	Nuclear receptor	29	0.682	0.5	0.0061743	0.01		1	1	0	2019	2019
Malignant neoplasm of kidney	C0740457	ZEB2	9839	O60315	zinc finger E-box binding homeobox 2	Transcription factor	292	0.471	0.808	1	0.01		1	1	0	2013	2013
Malignant neoplasm of kidney	C0740457	PLAG1	5324	Q6DJT9	PLAG1 zinc finger	Transcription factor	219	0.493	0.808	0.99532	0.01		1	1	0	2019	2019
Malignant neoplasm of kidney	C0740457	MELK	9833	Q14680	maternal embryonic leucine zipper kinase	Kinase	94	0.566	0.577	4.5055e-22	0.01		1	1	0	2016	2016
Malignant neoplasm of kidney	C0740457	SPATA2	9825	Q9UM82	spermatogenesis associated 2		107	0.556	0.615	0.97889	0.01		1	1	0	2019	2019
Malignant neoplasm of kidney	C0740457	PON1	5444	P27169	paraoxonase 1		496	0.409	0.885	9.8142e-11	0.01		1	1	2	2011	2011
Malignant neoplasm of kidney	C0740457	CCHCR1	54535	Q8TD31	coiled-coil alpha-helical rod protein 1		193	0.505	0.808	1.0122e-16	0.01		1	1	0	2017	2017
Malignant neoplasm of kidney	C0740457	DLL4	54567	Q9NR61	delta like canonical Notch ligand 4		219	0.494	0.769	0.99982	0.01		1	1	0	2005	2005
Malignant neoplasm of kidney	C0740457	KEAP1	9817	Q14145	kelch like ECH associated protein 1		251	0.475	0.808	0.00038766	0.01		1	1	0	2017	2017
Malignant neoplasm of kidney	C0740457	PPARG	5468	P37231	peroxisome proliferator activated receptor gamma	Nuclear receptor	877	0.358	0.885	0.029194	0.01		1	1	0	2018	2018
Malignant neoplasm of kidney	C0740457	RADIL	55698	Q96JH8	Rap associating with DIL domain		7	0.861	0.192	6.2671e-23	0.01		1	1	0	2019	2019
Malignant neoplasm of kidney	C0740457	AP5M1	55745	Q9H0R1	adaptor related protein complex 5 subunit mu 1		28	0.695	0.385	1.3325e-09	0.01		1	1	0	2019	2019
Malignant neoplasm of kidney	C0740457	REG1A	5967	P05451	regenerating family member 1 alpha		264	0.467	0.846	1.3499e-05	0.01		0	1	0	1992	1992
Malignant neoplasm of kidney	C0740457	TTYH2	94015	Q9BSA4	tweety family member 2	Ion channel	19	0.76	0.154	9.9328e-05	0.01		1	1	0	2019	2019
Malignant neoplasm of kidney	C0740457	PSMA5	5686	P28066	proteasome 20S subunit alpha 5		34	0.674	0.538	0.99376	0.01		1	1	0	2017	2017
Malignant neoplasm of kidney	C0740457	SLC12A9	56996	Q9BXP2	solute carrier family 12 member 9	Transporter	280	0.454	0.769	1.1806e-15	0.01		1	1	0	1997	1997
Malignant neoplasm of kidney	C0740457	CD28	940	P10747	CD28 molecule		364	0.436	0.885	0.35779	0.01		1	1	0	2015	2015
Malignant neoplasm of kidney	C0740457	CIAPIN1	57019	Q6FI81	cytokine induced apoptosis inhibitor 1		33	0.691	0.385	0.0019035	0.01		1	1	0	2010	2010
Malignant neoplasm of kidney	C0740457	PSMD9	5715	O00233	proteasome 26S subunit, non-ATPase 9	Enzyme modulator	344	0.435	0.846	4.8603e-06	0.01		1	1	0	2011	2011
Malignant neoplasm of kidney	C0740457	SLC9A3R1	9368	O14745	SLC9A3 regulator 1		116	0.547	0.577	8.8416e-05	0.01		1	1	0	2015	2015
Malignant neoplasm of kidney	C0740457	MIR363	574031		microRNA 363		83	0.578	0.692		0.01		1	1	0	2016	2016
Malignant neoplasm of kidney	C0740457	PTHLH	5744	P12272	parathyroid hormone like hormone		321	0.453	0.846	0.81146	0.01		1	1	0	1997	1997
Malignant neoplasm of kidney	C0740457	MIR452	574412		microRNA 452		49	0.633	0.5		0.01		1	1	0	2018	2018
Malignant neoplasm of kidney	C0740457	TBCK	93627	Q8TEA7	TBC1 domain containing kinase	Kinase	85	0.65	0.654	2.0935e-15	0.01		1	1	0	2019	2019
Malignant neoplasm of kidney	C0740457	RETN	56729	Q9HD89	resistin		302	0.454	0.808	0.036545	0.01		1	1	0	2017	2017
Malignant neoplasm of kidney	C0740457	PSG2	5670	P11465	pregnancy specific beta-1-glycoprotein 2		210	0.492	0.731	1.382e-30	0.01		1	1	0	2017	2017
Malignant neoplasm of kidney	C0740457	FEZ1	9638	Q99689	fasciculation and elongation protein zeta 1		41	0.666	0.5	0.75002	0.01		1	1	0	2004	2004
Malignant neoplasm of kidney	C0740457	PRKCA	5578	P17252	protein kinase C alpha	Kinase	368	0.44	0.846	0.3677	0.01		1	1	0	2012	2012
Malignant neoplasm of kidney	C0740457	CD40LG	959	P29965	CD40 ligand	Signaling	453	0.414	0.846	0.72079	0.01		1	1	0	2002	2002
Malignant neoplasm of kidney	C0740457	NPEPPS	9520	P55786	aminopeptidase puromycin sensitive	Enzyme	172	0.519	0.808	1	0.01		1	1	0	2019	2019
Malignant neoplasm of kidney	C0740457	QKI	9444	Q96PU8	QKI, KH domain containing RNA binding	Nucleic acid binding	61	0.617	0.5	0.75121	0.01		1	1	0	2016	2016
Malignant neoplasm of kidney	C0740457	MAPK8	5599	P45983	mitogen-activated protein kinase 8	Kinase	520	0.397	0.885	0.99823	0.01		1	1	0	2009	2009
Malignant neoplasm of kidney	C0740457	MAPK13	5603	O15264	mitogen-activated protein kinase 13	Kinase	26	0.705	0.577	6.7197e-11	0.01		1	1	0	2016	2016
Malignant neoplasm of kidney	C0740457	MAP2K1	5604	Q02750	mitogen-activated protein kinase kinase 1	Kinase	389	0.439	0.846	0.89669	0.01		1	1	0	2012	2012
Malignant neoplasm of kidney	C0740457	PRODH	5625	O43272	proline dehydrogenase 1	Enzyme	85	0.612	0.692	5.3577e-12	0.01		1	1	0	2010	2010
Malignant neoplasm of kidney	C0740457	PROS1	5627	P07225	protein S		283	0.467	0.846	0.00047089	0.01		1	1	0	2019	2019
Malignant neoplasm of kidney	C0740457	ABCG2	9429	Q9UNQ0	ATP binding cassette subfamily G member 2 (Junior blood group)	Transporter	420	0.419	0.885	2.0957e-32	0.01		1	1	0	2013	2013
Malignant neoplasm of kidney	C0740457	MUC16	94025	Q8WXI7	mucin 16, cell surface associated		236	0.479	0.808	8.2703e-112	0.01		1	1	0	2017	2017
Malignant neoplasm of kidney	C0740457	TRIP11	9321	Q15643	thyroid hormone receptor interactor 11		148	0.595	0.654	1.714e-12	0.01		1	1	0	2017	2017
Malignant neoplasm of kidney	C0740457	ARHGAP24	83478	Q8N264	Rho GTPase activating protein 24		273	0.456	0.808	3.9495e-10	0.01		1	1	0	2007	2007
Malignant neoplasm of kidney	C0740457	CALM3	808	P0DP23;P0DP24;P0DP25	calmodulin 3	Calcium-binding protein	215	0.485	0.846	0.92749	0.01		1	1	0	2011	2011
Malignant neoplasm of kidney	C0740457	TGM2	7052	P21980	transglutaminase 2	Enzyme	315	0.445	0.808	6.8118e-18	0.01		1	1	0	2016	2016
Malignant neoplasm of kidney	C0740457	COL18A1	80781	P39060	collagen type XVIII alpha 1 chain		323	0.449	0.808	1.7414e-10	0.01		1	1	0	2018	2018
Malignant neoplasm of kidney	C0740457	THOP1	7064	P52888	thimet oligopeptidase 1	Enzyme	91	0.573	0.846	0.0001213	0.01		1	1	0	2019	2019
Malignant neoplasm of kidney	C0740457	THRB	7068	P10828	thyroid hormone receptor beta	Nuclear receptor	142	0.554	0.769	0.99676	0.01		1	1	0	2014	2014
Malignant neoplasm of kidney	C0740457	TIMP2	7077	P16035	TIMP metallopeptidase inhibitor 2	Enzyme modulator	404	0.425	0.846	0.78893	0.01		1	1	0	2013	2013
Malignant neoplasm of kidney	C0740457	PDHX	8050	O00330	pyruvate dehydrogenase complex component X	Enzyme	93	0.595	0.692	9.7242e-05	0.01		1	1	0	2005	2005
Malignant neoplasm of kidney	C0740457	TIMP3	7078	P35625	TIMP metallopeptidase inhibitor 3	Enzyme modulator	325	0.445	0.923	0.63037	0.01		1	1	0	2017	2017
Malignant neoplasm of kidney	C0740457	CALM2	805	P0DP23;P0DP24;P0DP25	calmodulin 2	Calcium-binding protein	252	0.472	0.808	0.92086	0.01		1	1	0	2011	2011
Malignant neoplasm of kidney	C0740457	CD276	80381	Q5ZPR3	CD276 molecule	Enzyme modulator	169	0.505	0.731	2.4699e-09	0.01		1	1	0	2019	2019
Malignant neoplasm of kidney	C0740457	TP73	7161	O15350	tumor protein p73	Transcription factor	300	0.449	0.808	0.99696	0.01		1	1	0	2007	2007
Malignant neoplasm of kidney	C0740457	PDCD1LG2	80380	Q9BQ51	programmed cell death 1 ligand 2		191	0.496	0.769	1.203e-05	0.01		1	1	0	2019	2019
Malignant neoplasm of kidney	C0740457	CDR3	8163		Cerebellar degeneration-related autoantigen-3		233	0.472	0.808		0.01		1	1	0	2016	2016
Malignant neoplasm of kidney	C0740457	VMP1	81671	Q96GC9	vacuole membrane protein 1	Signaling	47	0.674	0.462	0.96271	0.01		1	1	0	2008	2008
Malignant neoplasm of kidney	C0740457	ELOC	6921	Q15369	elongin C	Enzyme modulator	41	0.656	0.5	0.74421	0.01		1	1	0	2019	2019
Malignant neoplasm of kidney	C0740457	TCF4	6925	P15884	transcription factor 4	Transcription factor	378	0.464	0.846	0.99981	0.01		1	1	0	2009	2009
Malignant neoplasm of kidney	C0740457	MIR411	693121		microRNA 411		50	0.628	0.538		0.01		1	1	0	2017	2017
Malignant neoplasm of kidney	C0740457	MIR576	693161		microRNA 576		30	0.686	0.385		0.01		1	1	0	2019	2019
Malignant neoplasm of kidney	C0740457	MIR588	693173		microRNA 588		15	0.76	0.231		0.01		1	1	0	2019	2019
Malignant neoplasm of kidney	C0740457	MIR622	693207		microRNA 622		48	0.638	0.5		0.01		1	1	0	2018	2018
Malignant neoplasm of kidney	C0740457	MIR630	693215		microRNA 630		52	0.621	0.5		0.01		1	1	0	2014	2014
Malignant neoplasm of kidney	C0740457	BTG1	694	P62324	BTG anti-proliferation factor 1		98	0.564	0.692	0.53641	0.01		1	1	0	2015	2015
Malignant neoplasm of kidney	C0740457	BRAP	8315	Q7Z569	BRCA1 associated protein		82	0.612	0.769	3.7512e-06	0.01		1	1	0	2017	2017
Malignant neoplasm of kidney	C0740457	ARID1A	8289	O14497	AT-rich interaction domain 1A		341	0.455	0.846	1	0.01		1	1	0	2013	2013
Malignant neoplasm of kidney	C0740457	KDM5C	8242	P41229	lysine demethylase 5C		119	0.581	0.538	1	0.01		1	1	0	2015	2015
Malignant neoplasm of kidney	C0740457	MLRL	8201		Myeloid leukemia-related gene (myeloid tumor suppressor)		95	0.564	0.769		0.01		1	1	0	2018	2018
Malignant neoplasm of kidney	C0740457	PPP1R2C	80316	O14990	PPP1R2C family member C	Enzyme modulator	231	0.478	0.846		0.01		1	1	0	2019	2019
Malignant neoplasm of kidney	C0740457	TRPC4	7223	Q9UBN4	transient receptor potential cation channel subfamily C member 4	Ion channel	32	0.695	0.5	0.48205	0.01		1	1	0	2016	2016
Malignant neoplasm of kidney	C0740457	WT1	7490	P19544	WT1 transcription factor	Nucleic acid binding	446	0.422	0.808	0.99648	0.01		1	1	0	2003	2003
Malignant neoplasm of kidney	C0740457	XPO1	7514	O14980	exportin 1	Receptor	178	0.504	0.692	1	0.01		1	1	0	2013	2013
Malignant neoplasm of kidney	C0740457	XRCC1	7515	P18887	X-ray repair cross complementing 1		410	0.421	0.923	6.3386e-09	0.01		1	1	0	2015	2015
Malignant neoplasm of kidney	C0740457	ZFX	7543	P17010	zinc finger protein X-linked	Transcription factor	66	0.599	0.538	0.99831	0.01		1	1	0	2015	2015
Malignant neoplasm of kidney	C0740457	CALCA	796	P01258;P06881	calcitonin related polypeptide alpha	Signaling	467	0.416	0.923	0.015562	0.01		0	1	0	2004	2004
Malignant neoplasm of kidney	C0740457	ZNF99	7652	A8MXY4	zinc finger protein 99		2	0.931	0.115	0.02495	0.01		1	1	0	2019	2019
Malignant neoplasm of kidney	C0740457	MUL1	79594	Q969V5	mitochondrial E3 ubiquitin protein ligase 1		241	0.473	0.808	1.9108e-06	0.01		1	1	0	2004	2004
Malignant neoplasm of kidney	C0740457	FSD1	79187	Q9BTV5	fibronectin type III and SPRY domain containing 1		220	0.486	0.808	0.25199	0.01		1	1	0	2019	2019
Malignant neoplasm of kidney	C0740457	ZNF154	7710	Q13106	zinc finger protein 154		23	0.711	0.5	2.8224e-07	0.01		1	1	0	2016	2016
Malignant neoplasm of kidney	C0740457	DDR1	780	Q08345	discoidin domain receptor tyrosine kinase 1	Kinase	195	0.497	0.808	4.6331e-06	0.01		1	1	0	2010	2010
Malignant neoplasm of kidney	C0740457	BTG2	7832	P78543	BTG anti-proliferation factor 2		77	0.587	0.538	0.019033	0.01		1	1	0	2004	2004
Malignant neoplasm of kidney	C0740457	TRPM8	79054	Q7Z2W7	transient receptor potential cation channel subfamily M member 8	Ion channel	127	0.553	0.808	4.5964e-29	0.01		1	1	0	2016	2016
Malignant neoplasm of kidney	C0740457	NSD2	7468	O96028	nuclear receptor binding SET domain protein 2	Epigenetic regulator	224	0.507	0.769	1	0.01		1	1	0	2019	2019
Malignant neoplasm of kidney	C0740457	MCPH1	79648	Q8NEM0	microcephalin 1	Nucleic acid binding	141	0.54	0.846	7.76e-30	0.01		1	1	0	2014	2014
Malignant neoplasm of kidney	C0740457	TSC1	7248	Q92574	TSC complex subunit 1		391	0.44	0.808	1	0.01		1	1	0	2002	2002
Malignant neoplasm of kidney	C0740457	CDK5RAP3	80279	Q96JB5	CDK5 regulatory subunit associated protein 3		29	0.7	0.462	7.6348e-15	0.01		1	1	0	2019	2019
Malignant neoplasm of kidney	C0740457	SCUBE1	80274	Q8IWY4	signal peptide, CUB domain and EGF like domain containing 1	Extracellular structure	23	0.743	0.5	0.96076	0.01		1	1	0	2017	2017
Malignant neoplasm of kidney	C0740457	TYMS	7298	P04818	thymidylate synthetase	Enzyme	406	0.425	0.846	0.72247	0.01		1	1	0	2009	2009
Malignant neoplasm of kidney	C0740457	UGT1A	7361		UDP glucuronosyltransferase family 1 member A complex locus		117	0.54	0.654		0.01		1	1	0	2016	2016
Malignant neoplasm of kidney	C0740457	UGT2B7	7364	P16662	UDP glucuronosyltransferase family 2 member B7		53	0.647	0.5	1.191e-13	0.01		1	1	0	2013	2013
Malignant neoplasm of kidney	C0740457	KDM6A	7403	O15550	lysine demethylase 6A	Epigenetic regulator	238	0.498	0.769	1	0.01		1	1	0	2014	2014
Malignant neoplasm of kidney	C0740457	ZC3H12A	80149	Q5D1E8	zinc finger CCCH-type containing 12A	Nucleic acid binding	88	0.578	0.654	0.14015	0.01		1	1	0	2017	2017
Malignant neoplasm of kidney	C0740457	CALM1	801	P0DP23;P0DP24;P0DP25	calmodulin 1	Calcium-binding protein	253	0.472	0.808	0.94473	0.01		1	1	0	2011	2011
Malignant neoplasm of kidney	C0740457	GRHL2	79977	Q6ISB3	grainyhead like transcription factor 2	Transcription factor	85	0.59	0.731	0.99683	0.01		1	1	0	2014	2014
Malignant neoplasm of kidney	C0740457	NANOG	79923	Q9H9S0	Nanog homeobox	Transcription factor	140	0.531	0.654	0.72022	0.01		1	1	0	2018	2018
Malignant neoplasm of kidney	C0740457	CAMKMT	79823	Q7Z624	calmodulin-lysine N-methyltransferase		185	0.51	0.808	1.3806e-15	0.01		1	1	0	2011	2011
Malignant neoplasm of kidney	C0740457	SEMA3B	7869	Q13214	semaphorin 3B	Signaling	57	0.633	0.615		0.01		1	1	0	2015	2015
Malignant neoplasm of kidney	C0740457	ARHGEF7	8874	Q14155	Rho guanine nucleotide exchange factor 7		215	0.486	0.846	0.99995	0.01		1	1	0	2018	2018
Malignant neoplasm of kidney	C0740457	RUNX1	861	Q01196	RUNX family transcription factor 1	Transcription factor	412	0.425	0.808	0.65377	0.01		1	1	0	2015	2015
Malignant neoplasm of kidney	C0740457	SGK1	6446	O00141	serum/glucocorticoid regulated kinase 1	Kinase	188	0.506	0.769	0.0023046	0.01		1	1	0	2007	2007
Malignant neoplasm of kidney	C0740457	RUNX2	860	Q13950	RUNX family transcription factor 2	Transcription factor	405	0.437	0.846	0.94884	0.01		0	1	0	2004	2004
Malignant neoplasm of kidney	C0740457	CAV2	858	P51636	caveolin 2	Enzyme modulator	96	0.575	0.692	0.026973	0.01		1	1	0	2018	2018
Malignant neoplasm of kidney	C0740457	SHBG	6462	P04278	sex hormone binding globulin		368	0.438	0.808	1.2538e-06	0.01		1	1	0	2017	2017
Malignant neoplasm of kidney	C0740457	GORASP1	64689	Q9BQQ3	golgi reassembly stacking protein 1		369	0.428	0.846	0.019543	0.01		1	1	0	2019	2019
Malignant neoplasm of kidney	C0740457	CDCP1	64866	Q9H5V8	CUB domain containing protein 1		81	0.604	0.654	0.0001002	0.01		1	1	0	2011	2011
Malignant neoplasm of kidney	C0740457	LINC00273	649159		long intergenic non-protein coding RNA 273		82	0.585	0.846		0.01		1	1	0	2019	2019
Malignant neoplasm of kidney	C0740457	SKP2	6502	Q13309	S-phase kinase associated protein 2		204	0.492	0.808	0.96042	0.01		1	1	0	2014	2014
Malignant neoplasm of kidney	C0740457	WNK1	65125	Q9H4A3	WNK lysine deficient protein kinase 1	Kinase	460	0.416	0.846	1	0.01		1	1	0	2019	2019
Malignant neoplasm of kidney	C0740457	SLC2A1	6513	P11166	solute carrier family 2 member 1	Transporter	687	0.388	0.808	0.9941	0.01		1	1	0	2017	2017
Malignant neoplasm of kidney	C0740457	PAX8	7849	Q06710	paired box 8		253	0.477	0.731	0.99869	0.01		1	1	0	2011	2011
Malignant neoplasm of kidney	C0740457	SRSF2	6427	Q01130	serine and arginine rich splicing factor 2	Nucleic acid binding	102	0.561	0.731	0.47898	0.01		1	1	0	2018	2018
Malignant neoplasm of kidney	C0740457	SRSF1	6426	Q07955	serine and arginine rich splicing factor 1	Nucleic acid binding	98	0.563	0.692	0.98268	0.01		1	1	0	2018	2018
Malignant neoplasm of kidney	C0740457	NR1I2	8856	O75469	nuclear receptor subfamily 1 group I member 2	Nuclear receptor	462	0.418	0.846	7.2668e-09	0.01		1	1	0	2011	2011
Malignant neoplasm of kidney	C0740457	SDHD	6392	O14521	succinate dehydrogenase complex subunit D	Transporter	348	0.472	0.885	0.33697	0.01		1	1	0	2012	2012
Malignant neoplasm of kidney	C0740457	SEA	6395		S13 erythroblastosis (avian) oncogene homolog		65	0.606	0.615		0.01		1	1	0	2013	2013
Malignant neoplasm of kidney	C0740457	TNFRSF6B	8771	O95407	TNF receptor superfamily member 6b		145	0.528	0.731	3.874e-06	0.01		1	1	0	2008	2008
Malignant neoplasm of kidney	C0740457	LRRC4	64101	Q9HBW1	leucine rich repeat containing 4		57	0.617	0.577	0.99787	0.01		1	1	0	2009	2009
Malignant neoplasm of kidney	C0740457	NOD2	64127	Q9HC29	nucleotide binding oligomerization domain containing 2	Enzyme	434	0.423	0.923	1.9834e-30	0.01		1	1	0	2017	2017
Malignant neoplasm of kidney	C0740457	SFPQ	6421	P23246	splicing factor proline and glutamine rich	Nucleic acid binding	75	0.593	0.654	0.99992	0.01		1	1	0	2009	2009
Malignant neoplasm of kidney	C0740457	ADAM9	8754	Q13443	ADAM metallopeptidase domain 9	Enzyme	109	0.56	0.654	0.029431	0.01		1	1	0	2008	2008
Malignant neoplasm of kidney	C0740457	RUNX3	864	Q13761	RUNX family transcription factor 3	Transcription factor	281	0.459	0.731	0.84295	0.01		1	1	0	2018	2018
Malignant neoplasm of kidney	C0740457	SFRP2	6423	Q96HF1	secreted frizzled related protein 2		134	0.544	0.731	0.0016693	0.01		1	1	0	2010	2010
Malignant neoplasm of kidney	C0740457	SFRP5	6425	Q5T4F7	secreted frizzled related protein 5		106	0.559	0.692	5.1843e-06	0.01		1	1	0	2011	2011
Malignant neoplasm of kidney	C0740457	UNC5C	8633	O95185	unc-5 netrin receptor C	Receptor	47	0.65	0.462	0.0008813	0.01		1	1	0	2003	2003
Malignant neoplasm of kidney	C0740457	SLC3A2	6520	P08195	solute carrier family 3 member 2	Transporter	108	0.565	0.731	4.2163e-08	0.01		1	1	0	2013	2013
Malignant neoplasm of kidney	C0740457	COPS3	8533	Q9UNS2	COP9 signalosome subunit 3	Enzyme modulator	24	0.729	0.346	0.99949	0.01		1	1	0	2018	2018
Malignant neoplasm of kidney	C0740457	BRCA1	672	P38398	BRCA1 DNA repair associated	Enzyme	747	0.367	0.923	9.2157e-29	0.01		1	1	0	2019	2019
Malignant neoplasm of kidney	C0740457	CASP8	841	Q14790	caspase 8	Enzyme	480	0.404	0.923	3.7236e-06	0.01		1	1	0	2018	2018
Malignant neoplasm of kidney	C0740457	FSD1L	83856	Q9BXM9	fibronectin type III and SPRY domain containing 1 like		216	0.488	0.808	0.23386	0.01		1	1	0	2019	2019
Malignant neoplasm of kidney	C0740457	STAT5A	6776	P42229	signal transducer and activator of transcription 5A	Nucleic acid binding	318	0.445	0.808	0.99994	0.01		1	1	0	2019	2019
Malignant neoplasm of kidney	C0740457	STAT5B	6777	P51692	signal transducer and activator of transcription 5B	Nucleic acid binding	357	0.442	0.808	0.99988	0.01		1	1	0	2019	2019
Malignant neoplasm of kidney	C0740457	CASP5	838	P51878	caspase 5	Enzyme	47	0.653	0.5	1.752e-16	0.01		1	1	0	2009	2009
Malignant neoplasm of kidney	C0740457	CASP3	836	P42574	caspase 3	Enzyme	819	0.351	0.923	0.10017	0.01		1	1	0	2006	2006
Malignant neoplasm of kidney	C0740457	SART1	9092	O43290	spliceosome associated factor 1, recruiter of U4/U6.U5 tri-snRNP	Extracellular structure	31	0.682	0.308	0.88163	0.01		1	1	0	2019	2019
Malignant neoplasm of kidney	C0740457	SYK	6850	P43405	spleen associated tyrosine kinase	Kinase	229	0.475	0.808	0.99986	0.01		1	1	0	2018	2018
Malignant neoplasm of kidney	C0740457	SYT1	6857	P21579	synaptotagmin 1	Transporter	460	0.412	0.846	0.60038	0.01		1	1	0	2019	2019
Malignant neoplasm of kidney	C0740457	BCL2L12	83596	Q9HB09	BCL2 like 12		67	0.606	0.654	3.8273e-09	0.01		1	1	0	2015	2015
Malignant neoplasm of kidney	C0740457	ADAM17	6868	P78536	ADAM metallopeptidase domain 17		316	0.453	0.808	0.99528	0.01		1	1	0	2013	2013
Malignant neoplasm of kidney	C0740457	SPP1	6696	P10451	secreted phosphoprotein 1		824	0.353	0.885	2.146e-06	0.01		0	1	0	2004	2004
Malignant neoplasm of kidney	C0740457	SPINK1	6690	P00995	serine peptidase inhibitor Kazal type 1		216	0.492	0.808	0.31476	0.01		1	1	0	1999	1999
Malignant neoplasm of kidney	C0740457	SLC12A3	6559	P55017	solute carrier family 12 member 3	Transporter	252	0.493	0.808	3.0324e-32	0.01		1	1	0	2002	2002
Malignant neoplasm of kidney	C0740457	SLC16A1	6566	P53985	solute carrier family 16 member 1	Transporter	195	0.499	0.846	0.00073565	0.01		1	1	0	2019	2019
Malignant neoplasm of kidney	C0740457	SLC22A3	6581	O75751	solute carrier family 22 member 3	Transporter	154	0.531	0.846	7.7723e-10	0.01		1	1	0	2019	2019
Malignant neoplasm of kidney	C0740457	SMARCA1	6594	P28370	SWI/SNF related, matrix associated, actin dependent regulator of chromatin, subfamily a, member 1	Enzyme	183	0.504	0.808	1	0.01		1	1	0	2013	2013
Malignant neoplasm of kidney	C0740457	PPM1D	8493	O15297	protein phosphatase, Mg2+/Mn2+ dependent 1D	Enzyme	177	0.513	0.808	2.2321e-11	0.01		1	1	0	2015	2015
Malignant neoplasm of kidney	C0740457	HAVCR2	84868	Q8TDQ0	hepatitis A virus cellular receptor 2		299	0.45	0.808	0.03866	0.01		1	1	0	2016	2016
Malignant neoplasm of kidney	C0740457	SNAI1	6615	O95863	snail family transcriptional repressor 1		243	0.474	0.808	0.21754	0.01		1	1	0	2017	2017
Malignant neoplasm of kidney	C0740457	SNCA	6622	P37840	synuclein alpha	Transporter	449	0.427	0.885	0.8829	0.01		1	1	0	2019	2019
Malignant neoplasm of kidney	C0740457	HNRNPA1P10	664709		heterogeneous nuclear ribonucleoprotein A1 pseudogene 10		53	0.631	0.654		0.01		1	1	0	2018	2018
Malignant neoplasm of kidney	C0740457	CUL1	8454	Q13616	cullin 1	Enzyme	58	0.617	0.615	1	0.01		1	1	0	2008	2008
Malignant neoplasm of kidney	C0740457	SYVN1	84447	Q86TM6	synoviolin 1		79	0.599	0.731	0.9997	0.01		1	1	0	1988	1988
Malignant neoplasm of kidney	C0740457	AKT1S1	84335	Q96B36	AKT1 substrate 1		55	0.615	0.385	0.111	0.01		1	1	0	2011	2011
Malignant neoplasm of kidney	C0740457	TAZ	6901	Q16635	tafazzin	Enzyme	252	0.477	0.808	0.72591	0.01		1	1	0	2019	2019
Malignant neoplasm of kidney	C0740457	PIN1	5300	Q13526	peptidylprolyl cis/trans isomerase, NIMA-interacting 1		212	0.488	0.769	0.74031	0.01		1	1	0	2011	2011
Malignant neoplasm of kidney	C0740457	CRY2	1408	Q49AN0	cryptochrome circadian regulator 2	Enzyme	76	0.599	0.692	0.00031808	0.01		1	1	0	2019	2019
Malignant neoplasm of kidney	C0740457	TIMM8A	1678	O60220	translocase of inner mitochondrial membrane 8A		200	0.51	0.846	0.65195	0.01		1	1	0	2018	2018
Malignant neoplasm of kidney	C0740457	RHOV	171177	Q96L33	ras homolog family member V	Enzyme modulator	34	0.67	0.5	0.76153	0.01		1	1	0	2018	2018
Malignant neoplasm of kidney	C0740457	AFP	174	P02771	alpha fetoprotein	Transporter	392	0.429	0.885	1.1383e-11	0.01		1	1	0	2017	2017
Malignant neoplasm of kidney	C0740457	DMRT1	1761	Q9Y5R6	doublesex and mab-3 related transcription factor 1		101	0.559	0.654	0.7387	0.01		1	1	0	2013	2013
Malignant neoplasm of kidney	C0740457	AGTR1	185	P30556	angiotensin II receptor type 1	G-protein coupled receptor	440	0.423	0.846	0.00053161	0.01		1	1	0	2018	2018
Malignant neoplasm of kidney	C0740457	E2F1	1869	Q01094	E2F transcription factor 1	Nucleic acid binding	324	0.441	0.846	0.9877	0.01		1	1	0	2013	2013
Malignant neoplasm of kidney	C0740457	EGR1	1958	P18146	early growth response 1	Nucleic acid binding	378	0.433	0.923	0.3509	0.01		1	1	0	2012	2012
Malignant neoplasm of kidney	C0740457	AHR	196	P35869	aryl hydrocarbon receptor	Transcription factor	532	0.41	0.923	0.99999	0.01		1	1	0	2014	2014
Malignant neoplasm of kidney	C0740457	ELF5	2001	Q9UKW6	E74 like ETS transcription factor 5	Transcription factor	34	0.691	0.385	0.00086946	0.01		1	1	0	2011	2011
Malignant neoplasm of kidney	C0740457	KLHDC8B	200942	Q8IXV7	kelch domain containing 8B		34	0.691	0.346	0.001791	0.01		1	1	0	2019	2019
Malignant neoplasm of kidney	C0740457	C4orf46	201725	Q504U0	chromosome 4 open reading frame 46		5	0.861	0.115	0.039595	0.01		1	1	0	2014	2014
Malignant neoplasm of kidney	C0740457	EPHA3	2042	P29320	EPH receptor A3	Kinase	193	0.497	0.692	1.1953e-05	0.01		1	1	0	2018	2018
Malignant neoplasm of kidney	C0740457	EPHB2	2048	P29323	EPH receptor B2	Kinase	649	0.374	0.846	0.99997	0.01		1	1	0	2019	2019
Malignant neoplasm of kidney	C0740457	ERBB2	2064	P04626	erb-b2 receptor tyrosine kinase 2	Kinase	995	0.328	0.923	0.0059892	0.01		1	1	0	1989	1989
Malignant neoplasm of kidney	C0740457	ERCC4	2072	Q92889	ERCC excision repair 4, endonuclease catalytic subunit	Enzyme	325	0.468	0.846	1.3758e-12	0.01		1	1	0	2016	2016
Malignant neoplasm of kidney	C0740457	DEFB1	1672	P60022	defensin beta 1		177	0.509	0.808	0.4059	0.01		1	1	0	2006	2006
Malignant neoplasm of kidney	C0740457	DDT	1652	P30046	D-dopachrome tautomerase	Enzyme	86	0.575	0.731	0.32959	0.01		1	1	0	2014	2014
Malignant neoplasm of kidney	C0740457	ACE	1636	P12821	angiotensin I converting enzyme	Enzyme	1082	0.328	0.923	1.0344e-37	0.01		1	1	0	2000	2000
Malignant neoplasm of kidney	C0740457	CRYZ	1429	Q08257	crystallin zeta		145	0.524	0.731	5.6616e-23	0.01		1	1	0	1994	1994
Malignant neoplasm of kidney	C0740457	CREB3L4	148327	Q8TEY5	cAMP responsive element binding protein 3 like 4		24	0.722	0.385	5.1401e-06	0.01		1	1	0	2016	2016
Malignant neoplasm of kidney	C0740457	C1orf52	148423	Q8N6N3	chromosome 1 open reading frame 52		27	0.691	0.5	0.047382	0.01		1	1	0	2009	2009
Malignant neoplasm of kidney	C0740457	CTAG1B	1485	P78358	cancer/testis antigen 1B		166	0.507	0.731		0.01		1	1	0	2013	2013
Malignant neoplasm of kidney	C0740457	CTSB	1508	P07858	cathepsin B	Enzyme	304	0.457	0.846	5.8819e-11	0.01		1	1	0	2019	2019
Malignant neoplasm of kidney	C0740457	CTSK	1513	P43235	cathepsin K	Enzyme	221	0.497	0.808	3.0989e-05	0.01		1	1	0	2013	2013
Malignant neoplasm of kidney	C0740457	GPBAR1	151306	Q8TDU6	G protein-coupled bile acid receptor 1	G-protein coupled receptor	122	0.548	0.731	1.3633e-09	0.01		1	1	0	2017	2017
Malignant neoplasm of kidney	C0740457	AMOT	154796	Q4VCS5	angiomotin		52	0.641	0.538	0.99666	0.01		1	1	0	2017	2017
Malignant neoplasm of kidney	C0740457	CYP3A4	1576	P08684	cytochrome P450 family 3 subfamily A member 4	Enzyme	291	0.462	0.885	5.7979e-11	0.01		1	1	0	2019	2019
Malignant neoplasm of kidney	C0740457	CYP11B1	1584	P15538	cytochrome P450 family 11 subfamily B member 1		139	0.563	0.615	8.245e-07	0.01		1	1	0	2002	2002
Malignant neoplasm of kidney	C0740457	CYP11B2	1585	P19099	cytochrome P450 family 11 subfamily B member 2		142	0.553	0.615	7.1321e-19	0.01		1	1	0	2002	2002
Malignant neoplasm of kidney	C0740457	CBLL2	158506	Q8N7E2	Cbl proto-oncogene like 2	Enzyme	235	0.476	0.808		0.01		1	1	0	2004	2004
Malignant neoplasm of kidney	C0740457	CYP17A1	1586	P05093	cytochrome P450 family 17 subfamily A member 1		326	0.462	0.769	0.00026255	0.01		1	1	0	2002	2002
Malignant neoplasm of kidney	C0740457	DAPK1	1612	P53355	death associated protein kinase 1	Kinase	249	0.472	0.808	0.99767	0.01		1	1	0	2006	2006
Malignant neoplasm of kidney	C0740457	DBP	1628	Q10586	D-box binding PAR bZIP transcription factor	Nucleic acid binding	105	0.556	0.731	0.23376	0.01		1	1	0	2017	2017
Malignant neoplasm of kidney	C0740457	EZH2	2146	Q15910	enhancer of zeste 2 polycomb repressive complex 2 subunit	Epigenetic regulator	653	0.376	0.885	1	0.01		1	1	0	2017	2017
Malignant neoplasm of kidney	C0740457	F12	2161	P00748	coagulation factor XII	Enzyme	87	0.612	0.577	8.2526e-08	0.01		1	1	0	2019	2019
Malignant neoplasm of kidney	C0740457	GABARAPL1	23710	Q9H0R8	GABA type A receptor associated protein like 1	Cellular structure	30	0.691	0.5	0.83532	0.01		1	1	0	2015	2015
Malignant neoplasm of kidney	C0740457	ALOX5	240	P09917	arachidonate 5-lipoxygenase	Enzyme	342	0.447	0.885	1.2059e-06	0.01		1	1	0	2007	2007
Malignant neoplasm of kidney	C0740457	FRK	2444	P42685	fyn related Src family tyrosine kinase	Kinase	43	0.674	0.5	1.8071e-12	0.01		1	1	0	2019	2019
Malignant neoplasm of kidney	C0740457	CTAG1A	246100	P78358	cancer/testis antigen 1A		161	0.508	0.731		0.01		1	1	0	2013	2013
Malignant neoplasm of kidney	C0740457	FRZB	2487	Q92765	frizzled related protein		89	0.573	0.654	0.0010842	0.01		1	1	0	2010	2010
Malignant neoplasm of kidney	C0740457	NR5A1	2516	Q13285	nuclear receptor subfamily 5 group A member 1	Nuclear receptor	255	0.479	0.731	0.9896	0.01		1	1	0	2012	2012
Malignant neoplasm of kidney	C0740457	STXBP4	252983	Q6ZWJ1	syntaxin binding protein 4		18	0.76	0.231	2.5154e-14	0.01		1	1	0	2020	2020
Malignant neoplasm of kidney	C0740457	FNDC5	252995	Q8NAU1	fibronectin type III domain containing 5		61	0.631	0.538	0.5458	0.01		1	1	0	2018	2018
Malignant neoplasm of kidney	C0740457	G6PD	2539	P11413	glucose-6-phosphate dehydrogenase	Enzyme	410	0.424	0.846	0.97158	0.01		1	1	0	2017	2017
Malignant neoplasm of kidney	C0740457	GABPB1	2553	Q06547	GA binding protein transcription factor subunit beta 1		16	0.743	0.346	0.91121	0.01		1	1	0	2018	2018
Malignant neoplasm of kidney	C0740457	PRDX5	25824	P30044	peroxiredoxin 5		153	0.522	0.808	0.00017921	0.01		1	1	0	2019	2019
Malignant neoplasm of kidney	C0740457	RCHY1	25898	Q96PM5	ring finger and CHY zinc finger domain containing 1	Enzyme	26	0.716	0.462	0.066203	0.01		1	1	0	2013	2013
Malignant neoplasm of kidney	C0740457	CHMP2B	25978	Q9UQN3	charged multivesicular body protein 2B		177	0.543	0.731	4.6203e-06	0.01		1	1	0	2013	2013
Malignant neoplasm of kidney	C0740457	GAS6	2621	Q14393	growth arrest specific 6	Extracellular structure	190	0.5	0.769	0.034477	0.01		1	1	0	2017	2017
Malignant neoplasm of kidney	C0740457	GATA3	2625	P23771	GATA binding protein 3		429	0.415	0.846	0.89887	0.01		1	1	0	2016	2016
Malignant neoplasm of kidney	C0740457	NUP62	23636	P37198	nucleoporin 62	Transporter	273	0.47	0.885	0.95006	0.01		1	1	0	2020	2020
Malignant neoplasm of kidney	C0740457	CORO1C	23603	Q9ULV4	coronin 1C	Cellular structure	40	0.663	0.423	0.99813	0.01		1	1	0	2020	2020
Malignant neoplasm of kidney	C0740457	CABIN1	23523	Q9Y6J0	calcineurin binding protein 1	Enzyme modulator	136	0.536	0.846	3.2844e-17	0.01		1	1	0	2017	2017
Malignant neoplasm of kidney	C0740457	PTK2B	2185	Q14289	protein tyrosine kinase 2 beta	Kinase	319	0.448	0.808	0.93536	0.01		1	1	0	2018	2018
Malignant neoplasm of kidney	C0740457	FASN	2194	P49327	fatty acid synthase	Enzyme	245	0.474	0.846	1	0.01		1	1	0	2017	2017
Malignant neoplasm of kidney	C0740457	HOXA11-AS	221883		HOXA11 antisense RNA		60	0.61	0.423		0.01		1	1	0	2018	2018
Malignant neoplasm of kidney	C0740457	ALDH9A1	223	P49189	aldehyde dehydrogenase 9 family member A1	Enzyme	17	0.76	0.269	1.0995e-11	0.01		1	1	0	2015	2015
Malignant neoplasm of kidney	C0740457	PHLDA1	22822	Q8WV24	pleckstrin homology like domain family A member 1		48	0.647	0.462	0.79833	0.01		1	1	0	2018	2018
Malignant neoplasm of kidney	C0740457	NLRP1	22861	Q9C000	NLR family pyrin domain containing 1		200	0.502	0.769	4.9693e-19	0.01		1	1	0	2004	2004
Malignant neoplasm of kidney	C0740457	PLA2R1	22925	Q13018	phospholipase A2 receptor 1		59	0.633	0.577	3.2312e-30	0.01		1	1	0	2014	2014
Malignant neoplasm of kidney	C0740457	FOXM1	2305	Q08050	forkhead box M1		323	0.441	0.769	0.0007414	0.01		1	1	0	2018	2018
Malignant neoplasm of kidney	C0740457	MLANA	2315	Q16655	melan-A		92	0.579	0.692	1.2584e-09	0.01		1	1	0	2017	2017
Malignant neoplasm of kidney	C0740457	KANK1	23189	Q14678	KN motif and ankyrin repeat domains 1		56	0.641	0.538	7.9821e-18	0.01		1	1	0	2014	2014
Malignant neoplasm of kidney	C0740457	FLT1	2321	P17948	fms related receptor tyrosine kinase 1	Kinase	424	0.419	0.846	0.99983	0.01		1	1	0	2010	2010
Malignant neoplasm of kidney	C0740457	PPP1R13B	23368	Q96KQ4	protein phosphatase 1 regulatory subunit 13B	Enzyme modulator	70	0.599	0.692	0.99811	0.01		1	1	0	2018	2018
Malignant neoplasm of kidney	C0740457	CRTC1	23373	Q6UUV9	CREB regulated transcription coactivator 1	Transcription factor	115	0.565	0.692	0.531	0.01		1	1	0	2012	2012
Malignant neoplasm of kidney	C0740457	SIRT3	23410	Q9NTG7	sirtuin 3	Epigenetic regulator	227	0.488	0.731	0.00016261	0.01		1	1	0	2018	2018
Malignant neoplasm of kidney	C0740457	SF3B3	23450	Q15393	splicing factor 3b subunit 3	Nucleic acid binding	13	0.792	0.231	1	0.01		1	1	0	2017	2017
Malignant neoplasm of kidney	C0740457	GDF9	2661	O60383	growth differentiation factor 9	Signaling	44	0.644	0.385	5.5222e-06	0.01		1	1	0	2012	2012
Malignant neoplasm of kidney	C0740457	FILNC1	100132735		FOXO induced long non-coding RNA 1		7	0.861	0.115		0.01		1	1	0	2017	2017
Malignant neoplasm of kidney	C0740457	CDK5	1020	Q00535	cyclin dependent kinase 5	Kinase	204	0.495	0.846	0.13892	0.01		1	1	0	2019	2019
Malignant neoplasm of kidney	C0740457	DHRS2	10202	Q13268	dehydrogenase/reductase 2		20	0.736	0.385	8.7228e-07	0.01		1	1	0	2016	2016
Malignant neoplasm of kidney	C0740457	PLIN3	10226	O60664	perilipin 3	Transporter	14	0.736	0.423	1.179e-07	0.01		1	1	0	2018	2018
Malignant neoplasm of kidney	C0740457	ZFPM2-AS1	102723356		ZFPM2 antisense RNA 1		32	0.736	0.385		0.01		1	1	0	2019	2019
Malignant neoplasm of kidney	C0740457	PAK4	10298	O96013	p21 (RAC1) activated kinase 4	Kinase	81	0.584	0.731	4.3602e-05	0.01		1	1	0	2016	2016
Malignant neoplasm of kidney	C0740457	CDKN2B	1030	P42772	cyclin dependent kinase inhibitor 2B		440	0.417	0.769	0.0073369	0.01		1	1	0	2019	2019
Malignant neoplasm of kidney	C0740457	CDR2	1039	Q01850	cerebellar degeneration related protein 2		45	0.647	0.654	4.299e-07	0.01		1	1	0	2009	2009
Malignant neoplasm of kidney	C0740457	IRAIN	104472848		IGF1R antisense imprinted non-protein coding RNA		36	0.656	0.5		0.01		1	1	0	2009	2009
Malignant neoplasm of kidney	C0740457	CIB1	10519	Q99828	calcium and integrin binding 1		275	0.458	0.769	0.00032612	0.01		1	1	0	2007	2007
Malignant neoplasm of kidney	C0740457	ZNRD2	10534	O60232	zinc ribbon domain containing 2		311	0.443	0.769	1.8426e-07	0.01		1	1	0	2011	2011
Malignant neoplasm of kidney	C0740457	GLRX3	10539	O76003	glutaredoxin 3	Enzyme	37	0.686	0.538	0.35753	0.01		1	1	0	2009	2009
Malignant neoplasm of kidney	C0740457	CXCL13	10563	O43927	C-X-C motif chemokine ligand 13	Signaling	246	0.472	0.731	0.82566	0.01		1	1	0	2019	2019
Malignant neoplasm of kidney	C0740457	POSTN	10631	Q15063	periostin	Signaling	378	0.428	0.885	1.0666e-09	0.01		0	1	0	2004	2004
Malignant neoplasm of kidney	C0740457	NPRL2	10641	Q8WTW4	NPR2 like, GATOR1 complex subunit	Enzyme	45	0.644	0.462	0.38813	0.01		1	1	0	2016	2016
Malignant neoplasm of kidney	C0740457	KHDRBS1	10657	Q07666	KH RNA binding domain containing, signal transduction associated 1	Nucleic acid binding	289	0.457	0.846	0.99423	0.01		1	1	0	2020	2020
Malignant neoplasm of kidney	C0740457	ADAM10	102	O14672	ADAM metallopeptidase domain 10		224	0.489	0.846	1	0.01		1	1	0	2011	2011
Malignant neoplasm of kidney	C0740457	CDK2	1017	P24941	cyclin dependent kinase 2	Kinase	270	0.456	0.692	0.61054	0.01		1	1	0	2014	2014
Malignant neoplasm of kidney	C0740457	NAMPT	10135	P43490	nicotinamide phosphoribosyltransferase	Signaling	199	0.502	0.808	0.97914	0.01		1	1	0	2016	2016
Malignant neoplasm of kidney	C0740457	CD24	100133941	P25063	CD24 molecule		244	0.472	0.769		0.01		1	1	0	2018	2018
Malignant neoplasm of kidney	C0740457	KLLN	100144748	B2CW77	killin, p53 regulated DNA replication inhibitor		95	0.578	0.654	0.0050546	0.01		1	1	0	2010	2010
Malignant neoplasm of kidney	C0740457	TMED7-TICAM2	100302736	Q86XR7;Q9Y3B3	TMED7-TICAM2 readthrough		329	0.438	0.769	0.0025936	0.01		1	1	0	2011	2011
Malignant neoplasm of kidney	C0740457	MIR1260B	100422991		microRNA 1260b		21	0.711	0.423		0.01		1	1	0	2013	2013
Malignant neoplasm of kidney	C0740457	MICA	100507436	Q29983	MHC class I polypeptide-related sequence A		248	0.473	0.846	0.0049697	0.01		1	1	0	2014	2014
Malignant neoplasm of kidney	C0740457	EGFR-AS1	100507500		EGFR antisense RNA 1		20	0.722	0.192		0.01		1	1	0	2019	2019
Malignant neoplasm of kidney	C0740457	RPL17-C18orf32	100526842		RPL17-C18orf32 readthrough		93	0.572	0.615	0.57502	0.01		1	1	0	2019	2019
Malignant neoplasm of kidney	C0740457	RAB4B-EGLN2	100529264		RAB4B-EGLN2 readthrough (NMD candidate)		51	0.641	0.654		0.01		1	1	0	2009	2009
Malignant neoplasm of kidney	C0740457	ABCB6	10058	Q9NP58	ATP binding cassette subfamily B member 6 (Langereis blood group)	Transporter	400	0.431	0.885	8.5999e-19	0.01		1	1	0	2019	2019
Malignant neoplasm of kidney	C0740457	ERVE-4	100616105		endogenous retrovirus group E member 4		2	0.931	0.115		0.01		1	1	0	2016	2016
Malignant neoplasm of kidney	C0740457	PTPRU	10076	Q92729	protein tyrosine phosphatase receptor type U	Enzyme	88	0.581	0.654	0.39251	0.01		0	1	0	1992	1992
Malignant neoplasm of kidney	C0740457	USH1C	10083	Q9Y6N9	USH1 protein network component harmonin	Cellular structure	62	0.628	0.538	3.9714e-18	0.01		0	1	0	1999	1999
Malignant neoplasm of kidney	C0740457	LINC-ROR	100885779		long intergenic non-protein coding RNA, regulator of reprogramming		108	0.548	0.769		0.01		1	1	0	2017	2017
Malignant neoplasm of kidney	C0740457	SGK2	10110	Q9HBY8	serum/glucocorticoid regulated kinase 2	Kinase	13	0.78	0.192	2.1934e-12	0.01		1	1	0	2019	2019
Malignant neoplasm of kidney	C0740457	TRAP1	10131	Q12931	TNF receptor associated protein 1	Chaperone	90	0.59	0.615	1.5965e-29	0.01		1	1	0	2018	2018
Malignant neoplasm of kidney	C0740457	DCTN6	10671	O00399	dynactin subunit 6	Cellular structure	315	0.442	0.769	0.055741	0.01		1	1	0	2011	2011
Malignant neoplasm of kidney	C0740457	MTCO2P12	107075310		MT-CO2 pseudogene 12		703	0.368	0.962		0.01		1	1	0	2017	2017
Malignant neoplasm of kidney	C0740457	NLRP3	114548	Q96P20	NLR family pyrin domain containing 3		805	0.361	0.962	0.00081103	0.01		1	1	0	2019	2019
Malignant neoplasm of kidney	C0740457	H3P23	115482696		H3 histone pseudogene 23		310	0.443	0.769		0.01		1	1	0	2011	2011
Malignant neoplasm of kidney	C0740457	DIRC1	116093	Q969H9	disrupted in renal carcinoma 1		10	0.861	0.154		0.01		1	1	0	2001	2001
Malignant neoplasm of kidney	C0740457	TWIST2	117581	Q8WVJ9	twist family bHLH transcription factor 2	Transcription factor	198	0.518	0.731	0.56004	0.01		1	1	0	2018	2018
Malignant neoplasm of kidney	C0740457	TMEM132D	121256	Q14C87	transmembrane protein 132D		59	0.617	0.692	0.99907	0.01		1	1	0	2018	2018
Malignant neoplasm of kidney	C0740457	CCR4	1233	P51679	C-C motif chemokine receptor 4	G-protein coupled receptor	168	0.51	0.731	0.06863	0.01		1	1	0	2017	2017
Malignant neoplasm of kidney	C0740457	ABCC2	1244	Q92887	ATP binding cassette subfamily C member 2	Transporter	254	0.483	0.808	5.2025e-47	0.01		1	1	0	2007	2007
Malignant neoplasm of kidney	C0740457	COL1A1	1277	P02452	collagen type I alpha 1 chain		487	0.43	0.808	1	0.01		1	1	0	2006	2006
Malignant neoplasm of kidney	C0740457	KLF6	1316	Q99612	Kruppel like factor 6	Nucleic acid binding	204	0.501	0.846	0.97946	0.01		1	1	0	2008	2008
Malignant neoplasm of kidney	C0740457	ADORA2A	135	P29274	adenosine A2a receptor	G-protein coupled receptor	213	0.526	0.769	0.5971	0.01		1	1	0	2020	2020
Malignant neoplasm of kidney	C0740457	CREB1	1385	P16220	cAMP responsive element binding protein 1		294	0.463	0.885	0.99673	0.01		1	1	0	2016	2016
Malignant neoplasm of kidney	C0740457	CRH	1392	P06850	corticotropin releasing hormone	Signaling	402	0.439	0.808	0.71614	0.01		1	1	0	2016	2016
Malignant neoplasm of kidney	C0740457	NAT2	10	P11245	N-acetyltransferase 2	Enzyme	311	0.451	0.885	3.2744e-06	0.01		1	1	0	2007	2007
Malignant neoplasm of kidney	C0740457	CRHBP	1393	P24387	corticotropin releasing hormone binding protein	Signaling	48	0.659	0.5	0.21476	0.01		1	1	0	2013	2013
Malignant neoplasm of kidney	C0740457	CRP	1401	P02741	C-reactive protein		1483	0.299	0.962	0.0036969	0.01		0	1	0	2018	2018
Malignant neoplasm of kidney	C0740457	LINC02605	112935892		long intergenic non-protein coding RNA 2605		203	0.49	0.769		0.01		1	1	0	1999	1999
Malignant neoplasm of kidney	C0740457	KLF8	11279	O95600	Kruppel like factor 8	Nucleic acid binding	55	0.628	0.462	0.0022471	0.01		1	1	0	2017	2017
Malignant neoplasm of kidney	C0740457	CHP1	11261	Q99653	calcineurin like EF-hand protein 1		141	0.546	0.769	0.62667	0.01		1	1	0	2018	2018
Malignant neoplasm of kidney	C0740457	CHL1	10752	O00533	cell adhesion molecule L1 like		73	0.603	0.654	8.889e-12	0.01		1	1	0	2011	2011
Malignant neoplasm of kidney	C0740457	GIPC1	10755	O14908	GIPC PDZ domain containing family member 1	Enzyme	54	0.628	0.577	0.0083114	0.01		1	1	0	2010	2010
Malignant neoplasm of kidney	C0740457	LINC01852	107984773		long intergenic non-protein coding RNA 1852		8	0.821	0.192		0.01		1	1	0	2019	2019
Malignant neoplasm of kidney	C0740457	CEACAM3	1084	P40198	CEA cell adhesion molecule 3		204	0.494	0.731	1.067e-09	0.01		1	1	0	2017	2017
Malignant neoplasm of kidney	C0740457	PGRMC1	10857	O00264	progesterone receptor membrane component 1	Signaling	79	0.588	0.654	0.6711	0.01		1	1	0	2017	2017
Malignant neoplasm of kidney	C0740457	CEACAM7	1087	Q14002	CEA cell adhesion molecule 7		202	0.494	0.769	1.3466e-07	0.01		1	1	0	2017	2017
Malignant neoplasm of kidney	C0740457	NMU	10874	P48645	neuromedin U		68	0.61	0.808	0.00041549	0.01		1	1	0	2011	2011
Malignant neoplasm of kidney	C0740457	PPARGC1A	10891	Q9UBK2	PPARG coactivator 1 alpha	Transcription factor	350	0.453	0.885	0.9973	0.01		1	1	0	2019	2019
Malignant neoplasm of kidney	C0740457	COPS8	10920	Q99627	COP9 signalosome subunit 8	Signaling	13	0.805	0.231	0.72485	0.01		1	1	0	2017	2017
Malignant neoplasm of kidney	C0740457	ESM1	11082	Q9NQ30	endothelial cell specific molecule 1		81	0.595	0.654	0.21202	0.01		1	1	0	2007	2007
Malignant neoplasm of kidney	C0740457	LZTS1	11178	Q9Y250	leucine zipper tumor suppressor 1		50	0.633	0.385	0.95491	0.01		1	1	0	2004	2004
Malignant neoplasm of kidney	C0740457	WIF1	11197	Q9Y5W5	WNT inhibitory factor 1	Calcium-binding protein	171	0.507	0.731	1.3249e-09	0.01		1	1	0	2009	2009
Malignant neoplasm of kidney	C0740457	CHEK2	11200	O96017	checkpoint kinase 2	Kinase	297	0.46	0.808	1.2103e-24	0.01		1	1	1	2013	2013
Malignant neoplasm of kidney	C0740457	EGLN2	112398	Q96KS0	egl-9 family hypoxia inducible factor 2		68	0.604	0.731	0.72166	0.01		1	1	0	2009	2009
Malignant neoplasm of kidney	C0740457	LNCARSR	112577459		lncRNA regulator of Akt signaling associated with HCC and RCC		19	0.722	0.269		0.01		1	1	0	2016	2016
Malignant neoplasm of kidney	C0740457	GATA5	140628	Q9BWX5	GATA binding protein 5		101	0.578	0.615	0.28478	0.01		1	1	0	2012	2012
Malignant neoplasm of kidney	C0740457	GJB1	2705	P08034	gap junction protein beta 1	Cell-cell junction	224	0.514	0.731	0.84627	0.01		1	1	0	2005	2005
Malignant neoplasm of kidney	C0740457	MIR141	406933		microRNA 141		179	0.497	0.808		0.01		1	1	0	2016	2016
Malignant neoplasm of kidney	C0740457	MARCKS	4082	P29966	myristoylated alanine rich protein kinase C substrate		102	0.559	0.769	0.32648	0.01		1	1	0	2017	2017
Malignant neoplasm of kidney	C0740457	MC2R	4158	Q01718	melanocortin 2 receptor	G-protein coupled receptor	109	0.582	0.654	0.00030712	0.01		1	1	0	2001	2001
Malignant neoplasm of kidney	C0740457	ME1	4199	P48163	malic enzyme 1	Enzyme	58	0.628	0.615	8.2005e-14	0.01		1	1	0	2018	2018
Malignant neoplasm of kidney	C0740457	MME	4311	P08473	membrane metalloendopeptidase	Enzyme	470	0.407	0.808	1.465e-18	0.01		1	1	0	2010	2010
Malignant neoplasm of kidney	C0740457	MMP9	4318	P14780	matrix metallopeptidase 9	Enzyme	1337	0.305	0.923	1.8869e-17	0.01		1	1	0	2013	2013
Malignant neoplasm of kidney	C0740457	MMP16	4325	P51512	matrix metallopeptidase 16	Enzyme	58	0.626	0.577	0.91797	0.01		1	1	0	2018	2018
Malignant neoplasm of kidney	C0740457	MRC1	4360	P22897	mannose receptor C-type 1		431	0.413	0.846	0.94335	0.01		1	1	0	2013	2013
Malignant neoplasm of kidney	C0740457	PRDM16-DT	440556		PRDM16 divergent transcript		9	0.805	0.231		0.01		1	1	0	2019	2019
Malignant neoplasm of kidney	C0740457	MIAT	440823		myocardial infarction associated transcript		84	0.573	0.692		0.01		1	1	0	2018	2018
Malignant neoplasm of kidney	C0740457	MSH2	4436	P43246	mutS homolog 2	Nucleic acid binding	490	0.406	0.808	0.89539	0.01		1	1	0	2006	2006
Malignant neoplasm of kidney	C0740457	COX2	4513	P00403	cytochrome c oxidase subunit II	Enzyme	875	0.352	0.962		0.01		1	1	0	2017	2017
Malignant neoplasm of kidney	C0740457	MYB	4602	P10242	MYB proto-oncogene, transcription factor		206	0.49	0.692	0.81924	0.01		1	1	0	2019	2019
Malignant neoplasm of kidney	C0740457	MYCL	4610	P12524	MYCL proto-oncogene, bHLH transcription factor	Transcription factor	79	0.599	0.731	0.11551	0.01		1	1	0	1996	1996
Malignant neoplasm of kidney	C0740457	ATP1A1	476	P05023	ATPase Na+/K+ transporting subunit alpha 1	Transporter	89	0.601	0.808	1	0.01		1	1	0	2017	2017
Malignant neoplasm of kidney	C0740457	ATP12A	479	P54707	ATPase H+/K+ transporting non-gastric alpha2 subunit	Transporter	102	0.575	0.769	7.1254e-14	0.01		1	1	0	2017	2017
Malignant neoplasm of kidney	C0740457	MIR17HG	407975	Q75NE6	miR-17-92a-1 cluster host gene		224	0.483	0.808		0.01		1	1	0	2010	2010
Malignant neoplasm of kidney	C0740457	MIR93	407050		microRNA 93		171	0.507	0.808		0.01		1	1	0	2014	2014
Malignant neoplasm of kidney	C0740457	MIR34B	407041		microRNA 34b		165	0.509	0.808		0.01		1	1	1	2014	2014
Malignant neoplasm of kidney	C0740457	MIR145	406937		microRNA 145		366	0.431	0.846		0.01		1	1	0	2013	2013
Malignant neoplasm of kidney	C0740457	MIR154	406946		microRNA 154		71	0.593	0.577		0.01		1	1	0	2018	2018
Malignant neoplasm of kidney	C0740457	MIR155	406947		microRNA 155		584	0.384	0.885		0.01		1	1	0	2010	2010
Malignant neoplasm of kidney	C0740457	MIR15A	406948		microRNA 15a		221	0.482	0.808		0.01		1	1	0	2012	2012
Malignant neoplasm of kidney	C0740457	MIR17	406952		microRNA 17		270	0.459	0.846		0.01		1	1	0	2015	2015
Malignant neoplasm of kidney	C0740457	MIR199B	406978		microRNA 199b		71	0.588	0.615		0.01		1	1	0	2018	2018
Malignant neoplasm of kidney	C0740457	MIR203A	406986		microRNA 203a		237	0.471	0.808		0.01		1	1	0	2015	2015
Malignant neoplasm of kidney	C0740457	MIR205	406988		microRNA 205		210	0.482	0.846		0.01		1	1	0	2011	2011
Malignant neoplasm of kidney	C0740457	MIR211	406993		microRNA 211		106	0.552	0.577		0.01		1	1	0	2017	2017
Malignant neoplasm of kidney	C0740457	MIR221	407006		microRNA 221		304	0.449	0.846		0.01		1	1	0	2019	2019
Malignant neoplasm of kidney	C0740457	MIR223	407008		microRNA 223		348	0.433	0.808		0.01		1	1	0	2019	2019
Malignant neoplasm of kidney	C0740457	MIR224	407009		microRNA 224		128	0.534	0.654		0.01		1	1	0	2011	2011
Malignant neoplasm of kidney	C0740457	MIR27B	407019		microRNA 27b		141	0.529	0.769		0.01		1	1	0	2015	2015
Malignant neoplasm of kidney	C0740457	MIR320A	407037		microRNA 320a		145	0.526	0.808		0.01		1	1	0	2018	2018
Malignant neoplasm of kidney	C0740457	MIR33A	407039		microRNA 33a		100	0.56	0.654		0.01		1	1	0	2019	2019
Malignant neoplasm of kidney	C0740457	NGFR	4804	P08138	nerve growth factor receptor	Receptor	256	0.477	0.846	0.097889	0.01		1	1	0	2016	2016
Malignant neoplasm of kidney	C0740457	ATP1B1	481	P05026	ATPase Na+/K+ transporting subunit beta 1	Transporter	34	0.7	0.462	0.99881	0.01		1	1	0	2014	2014
Malignant neoplasm of kidney	C0740457	NDUFA13	51079	Q9P0J0	NADH:ubiquinone oxidoreductase subunit A13	Enzyme	131	0.556	0.692	3.8049e-06	0.01		1	1	0	2010	2010
Malignant neoplasm of kidney	C0740457	ADIPOR1	51094	Q96A54	adiponectin receptor 1	Receptor	148	0.529	0.808	0.6584	0.01		1	1	0	2019	2019
Malignant neoplasm of kidney	C0740457	APH1A	51107	Q96BI3	aph-1 homolog A, gamma-secretase subunit	Enzyme modulator	45	0.656	0.538	0.79479	0.01		1	1	0	2009	2009
Malignant neoplasm of kidney	C0740457	PCNA	5111	P12004	proliferating cell nuclear antigen	Nucleic acid binding	581	0.382	0.846	0.97606	0.01		1	1	0	2019	2019
Malignant neoplasm of kidney	C0740457	ANGPTL4	51129	Q9BY76	angiopoietin like 4	Signaling	198	0.498	0.731	2.3089e-11	0.01		1	1	0	2003	2003
Malignant neoplasm of kidney	C0740457	ING4	51147	Q9UNL4	inhibitor of growth family member 4	Nucleic acid binding	92	0.573	0.577	0.029013	0.01		0	1	0	2017	2017
Malignant neoplasm of kidney	C0740457	DCTN4	51164	Q9UJW0	dynactin subunit 4		253	0.472	0.846	0.73221	0.01		1	1	0	2020	2020
Malignant neoplasm of kidney	C0740457	HSPA14	51182	Q0VDF9	heat shock protein family A (Hsp70) member 14		178	0.502	0.769	0.67359	0.01		1	1	0	2019	2019
Malignant neoplasm of kidney	C0740457	PLAC8	51316	Q9NZF1	placenta associated 8		48	0.641	0.654	0.11953	0.01		1	1	0	2020	2020
Malignant neoplasm of kidney	C0740457	GDE1	51573	Q9NZC3	glycerophosphodiester phosphodiesterase 1		228	0.481	0.808	6.1163e-06	0.01		1	1	0	2015	2015
Malignant neoplasm of kidney	C0740457	PDGFRB	5159	P09619	platelet derived growth factor receptor beta	Kinase	492	0.416	0.846	0.9041	0.01		1	1	0	2008	2008
Malignant neoplasm of kidney	C0740457	PDK1	5163	Q15118	pyruvate dehydrogenase kinase 1	Kinase	164	0.51	0.808	1.0963e-05	0.01		1	1	0	2018	2018
Malignant neoplasm of kidney	C0740457	PER1	5187	O15534	period circadian regulator 1	Transcription factor	111	0.556	0.731	0.00029308	0.01		1	1	0	2019	2019
Malignant neoplasm of kidney	C0740457	SLC25A3	5250	Q00325	solute carrier family 25 member 3	Transporter	112	0.566	0.692	0.074834	0.01		0	1	0	1992	1992
Malignant neoplasm of kidney	C0740457	SERPINA1	5265	P01009	serpin family A member 1	Enzyme modulator	482	0.41	0.923	6.8497e-08	0.01		1	1	0	2018	2018
Malignant neoplasm of kidney	C0740457	TMED7	51014	Q86XR7;Q9Y3B3	transmembrane p24 trafficking protein 7	Transporter	336	0.436	0.808	0.47966	0.01		1	1	0	2011	2011
Malignant neoplasm of kidney	C0740457	F11R	50848	Q9Y624	F11 receptor		127	0.542	0.731	1.8487e-05	0.01		1	1	0	2009	2009
Malignant neoplasm of kidney	C0740457	PAX2	5076	Q02962	paired box 2		216	0.495	0.731	0.66999	0.01		1	1	0	2008	2008
Malignant neoplasm of kidney	C0740457	NPAS2	4862	Q99743	neuronal PAS domain protein 2		82	0.595	0.654	1	0.01		1	1	0	2019	2019
Malignant neoplasm of kidney	C0740457	SLC11A2	4891	P49281	solute carrier family 11 member 2	Transporter	99	0.566	0.769	0.0066528	0.01		1	1	0	2013	2013
Malignant neoplasm of kidney	C0740457	ACR	49	P10323	acrosin	Enzyme	230	0.493	0.846	0.012215	0.01		1	1	0	2019	2019
Malignant neoplasm of kidney	C0740457	NT5E	4907	P21589	5'-nucleotidase ecto	Enzyme	376	0.436	0.885	2.2881e-11	0.01		1	1	0	2019	2019
Malignant neoplasm of kidney	C0740457	ROR1	4919	Q01973	receptor tyrosine kinase like orphan receptor 1	Kinase	109	0.552	0.731	0.99645	0.01		1	1	0	2005	2005
Malignant neoplasm of kidney	C0740457	NUCB2	4925	P80303	nucleobindin 2	Calcium-binding protein	140	0.54	0.731	2.0028e-10	0.01		1	1	0	2018	2018
Malignant neoplasm of kidney	C0740457	MIR375	494324		microRNA 375		226	0.476	0.769		0.01		1	1	0	2018	2018
Malignant neoplasm of kidney	C0740457	ATP4A	495	P20648	ATPase H+/K+ transporting subunit alpha	Transporter	101	0.575	0.769	9.4424e-12	0.01		1	1	0	2017	2017
Malignant neoplasm of kidney	C0740457	ODC1	4953	P11926	ornithine decarboxylase 1	Enzyme	184	0.51	0.731	0.16966	0.01		1	1	0	2018	2018
Malignant neoplasm of kidney	C0740457	OGG1	4968	O15527	8-oxoguanine DNA glycosylase		313	0.453	0.808	3.9314e-12	0.01		1	1	0	2002	2002
Malignant neoplasm of kidney	C0740457	ACO2	50	Q99798	aconitase 2	Enzyme	74	0.619	0.654	0.20791	0.01		1	1	0	2019	2019
Malignant neoplasm of kidney	C0740457	DUXAP9	503638		double homeobox A pseudogene 9		48	0.628	0.423		0.01		1	1	0	2019	2019
Malignant neoplasm of kidney	C0740457	PRDX1	5052	Q06830	peroxiredoxin 1	Enzyme	237	0.485	0.846	7.6959e-10	0.01		1	1	0	2019	2019
Malignant neoplasm of kidney	C0740457	PAK1	5058	Q13153	p21 (RAC1) activated kinase 1	Kinase	221	0.494	0.808	0.0013306	0.01		1	1	0	2007	2007
Malignant neoplasm of kidney	C0740457	PRKN	5071	O60260	parkin RBR E3 ubiquitin protein ligase	Enzyme	409	0.431	0.846	6.9346e-07	0.01		1	1	0	2004	2004
Malignant neoplasm of kidney	C0740457	PIK3R2	5296	O00459	phosphoinositide-3-kinase regulatory subunit 2	Enzyme modulator	120	0.551	0.808	0.016273	0.01		1	1	0	2018	2018
Malignant neoplasm of kidney	C0740457	CACYBP	27101	Q9HB71	calcyclin binding protein	Enzyme	61	0.617	0.692	0.91984	0.01		1	1	0	2008	2008
Malignant neoplasm of kidney	C0740457	PSAT1	29968	Q9Y617	phosphoserine aminotransferase 1		285	0.478	0.846	1.0621e-08	0.01		1	1	0	2019	2019
Malignant neoplasm of kidney	C0740457	ANXA2	302	P07355	annexin A2		294	0.453	0.808	9.7728e-05	0.01		1	1	0	2015	2015
Malignant neoplasm of kidney	C0740457	ANXA5	308	P08758	annexin A5		283	0.458	0.769	3.7978e-15	0.01		1	1	0	2010	2010
Malignant neoplasm of kidney	C0740457	ST6GALNAC6	30815	Q969X2	ST6 N-acetylgalactosaminide alpha-2,6-sialyltransferase 6		3	1	0.115	0.0022236	0.01		1	1	0	2007	2007
Malignant neoplasm of kidney	C0740457	HGF	3082	P14210	hepatocyte growth factor	Enzyme	671	0.374	0.885	0.99947	0.01		1	1	0	2004	2004
Malignant neoplasm of kidney	C0740457	HMOX1	3162	P09601	heme oxygenase 1		666	0.381	0.923	0.0096817	0.01		1	1	0	2011	2011
Malignant neoplasm of kidney	C0740457	APAF1	317	O14727	apoptotic peptidase activating factor 1		145	0.525	0.769	9.6242e-06	0.01		1	1	0	2006	2006
Malignant neoplasm of kidney	C0740457	HNRNPA1	3178	P09651	heterogeneous nuclear ribonucleoprotein A1		188	0.529	0.885	0.99911	0.01		1	1	0	2018	2018
Malignant neoplasm of kidney	C0740457	HOXC@	3220		homeobox C cluster		33	0.695	0.462		0.01		1	1	0	2015	2015
Malignant neoplasm of kidney	C0740457	ZAR1	326340	Q86SH2	zygote arrest 1		32	0.674	0.269	4.3531e-05	0.01		1	1	0	2019	2019
Malignant neoplasm of kidney	C0740457	HRAS	3265	P01112	HRas proto-oncogene, GTPase	Enzyme modulator	698	0.378	0.885	0.079774	0.01		1	1	0	1990	1990
Malignant neoplasm of kidney	C0740457	HRC	3270	P23327	histidine rich calcium binding protein		48	0.663	0.577	9.9367e-09	0.01		1	1	0	2004	2004
Malignant neoplasm of kidney	C0740457	HSP90AA1	3320	P07900	heat shock protein 90 alpha family class A member 1	Chaperone	455	0.411	0.923	0.86025	0.01		1	1	0	2012	2012
Malignant neoplasm of kidney	C0740457	HSPD1	3329	P10809	heat shock protein family D (Hsp60) member 1		398	0.432	0.808	0.99257	0.01		1	1	0	2019	2019
Malignant neoplasm of kidney	C0740457	APOA1	335	P02647	apolipoprotein A1		416	0.429	0.885	0.00054909	0.01		1	1	0	2015	2015
Malignant neoplasm of kidney	C0740457	OSGIN1	29948	Q9UJX0	oxidative stress induced growth inhibitor 1		24	0.729	0.423	1.5746e-11	0.01		1	1	0	2004	2004
Malignant neoplasm of kidney	C0740457	GTF2H1	2965	P32780	general transcription factor IIH subunit 1	Transcription factor	258	0.469	0.846	0.98982	0.01		1	1	0	2020	2020
Malignant neoplasm of kidney	C0740457	GRPR	2925	P30550	gastrin releasing peptide receptor	G-protein coupled receptor	85	0.595	0.538	0.22444	0.01		1	1	0	2014	2014
Malignant neoplasm of kidney	C0740457	DKK2	27123	Q9UBU2	dickkopf WNT signaling pathway inhibitor 2		74	0.599	0.692	0.75318	0.01		1	1	0	2009	2009
Malignant neoplasm of kidney	C0740457	IL37	27178	Q9NZH6	interleukin 37		280	0.459	0.846	0.00012343	0.01		1	1	0	2019	2019
Malignant neoplasm of kidney	C0740457	TMEM97	27346	Q5BJF2	transmembrane protein 97	Enzyme	78	0.604	0.615	0.00031267	0.01		1	1	0	2004	2004
Malignant neoplasm of kidney	C0740457	GLO1	2739	Q04760	glyoxalase I		137	0.537	0.769	9.6718e-07	0.01		1	1	0	2015	2015
Malignant neoplasm of kidney	C0740457	GLS	2744	O94925	glutaminase	Enzyme	217	0.489	0.808	0.96154	0.01		1	1	0	2017	2017
Malignant neoplasm of kidney	C0740457	ABO	28	P16442	ABO, alpha 1-3-N-acetylgalactosaminyltransferase and alpha 1-3-galactosyltransferase	Enzyme	443	0.427	0.885		0.01		1	1	0	2018	2018
Malignant neoplasm of kidney	C0740457	CXCR3	2833	P49682	C-X-C motif chemokine receptor 3	G-protein coupled receptor	367	0.436	0.808	0.181	0.01		1	1	0	2010	2010
Malignant neoplasm of kidney	C0740457	LOC284454	284454		uncharacterized LOC284454		6	0.839	0.231		0.01		1	1	0	2018	2018
Malignant neoplasm of kidney	C0740457	FAM83H	286077	Q6ZRV2	family with sequence similarity 83 member H		32	0.686	0.269	0.89239	0.01		1	1	0	2019	2019
Malignant neoplasm of kidney	C0740457	GPX1	2876	P07203	glutathione peroxidase 1	Enzyme	290	0.458	0.923	3.8518e-05	0.01		1	1	0	2019	2019
Malignant neoplasm of kidney	C0740457	GRN	2896	P28799	granulin precursor		412	0.435	0.846	0.069666	0.01		1	1	0	2009	2009
Malignant neoplasm of kidney	C0740457	PYCARD	29108	Q9ULZ3	PYD and CARD domain containing	Enzyme	294	0.457	0.808	0.00019768	0.01		1	1	0	2015	2015
Malignant neoplasm of kidney	C0740457	TBK1	29110	Q9UHD2	TANK binding kinase 1	Kinase	207	0.513	0.846	0.075174	0.01		1	1	0	2020	2020
Malignant neoplasm of kidney	C0740457	UHRF1	29128	Q96T88	ubiquitin like with PHD and ring finger domains 1		125	0.54	0.692		0.01		1	1	0	2009	2009
Malignant neoplasm of kidney	C0740457	GRP	2922	P07492	gastrin releasing peptide		172	0.524	0.769	0.0025347	0.01		1	1	0	2014	2014
Malignant neoplasm of kidney	C0740457	ICAM1	3383	P05362	intercellular adhesion molecule 1		737	0.364	0.962	0.035295	0.01		1	1	0	1992	1992
Malignant neoplasm of kidney	C0740457	IDH1	3417	O75874	isocitrate dehydrogenase (NADP(+)) 1		399	0.424	0.808	2.6244e-12	0.01		1	1	0	2016	2016
Malignant neoplasm of kidney	C0740457	ITGB2	3689	P05107	integrin subunit beta 2	Receptor	340	0.444	0.923	5.0817e-15	0.01		1	1	0	2019	2019
Malignant neoplasm of kidney	C0740457	KIR3DL1	3811	P43629	killer cell immunoglobulin like receptor, three Ig domains and long cytoplasmic tail 1	Receptor	231	0.475	0.769	8.3578e-14	0.01		1	1	0	2010	2010
Malignant neoplasm of kidney	C0740457	KISS1	3814	Q15726	KiSS-1 metastasis suppressor		179	0.507	0.808	0.49039	0.01		1	1	0	2012	2012
Malignant neoplasm of kidney	C0740457	KIT	3815	P10721	KIT proto-oncogene, receptor tyrosine kinase	Kinase	715	0.366	0.808	0.98087	0.01		1	1	0	2013	2013
Malignant neoplasm of kidney	C0740457	KIF11	3832	P52732	kinesin family member 11	Cellular structure	156	0.56	0.769	1	0.01		1	1	0	2019	2019
Malignant neoplasm of kidney	C0740457	KRAS	3845	P01116	KRAS proto-oncogene, GTPase	Enzyme modulator	1213	0.32	0.923	0.00078803	0.01		1	1	0	2019	2019
Malignant neoplasm of kidney	C0740457	TMIGD1	388364	Q6UXZ0	transmembrane and immunoglobulin domain containing 1		5	0.861	0.115	2.1298e-07	0.01		1	1	0	2018	2018
Malignant neoplasm of kidney	C0740457	L1CAM	3897	P32004	L1 cell adhesion molecule		289	0.475	0.769	1	0.01		1	1	0	2011	2011
Malignant neoplasm of kidney	C0740457	LDHA	3939	P00338	lactate dehydrogenase A	Enzyme	185	0.507	0.808	0.069173	0.01		1	1	0	2013	2013
Malignant neoplasm of kidney	C0740457	LEP	3952	P41159	leptin		931	0.349	0.846	0.46491	0.01		1	1	0	2020	2020
Malignant neoplasm of kidney	C0740457	LINC01194	404663		long intergenic non-protein coding RNA 1194		249	0.47	0.769		0.01		1	1	0	2009	2009
Malignant neoplasm of kidney	C0740457	MIRLET7I	406891		microRNA let-7i		86	0.575	0.615		0.01		1	1	0	2010	2010
Malignant neoplasm of kidney	C0740457	MIR106A	406899		microRNA 106a		140	0.524	0.846		0.01		1	1	0	2017	2017
Malignant neoplasm of kidney	C0740457	MIR10B	406903		microRNA 10b		167	0.509	0.808		0.01		1	1	0	2016	2016
Malignant neoplasm of kidney	C0740457	MIR125A	406910		microRNA 125a		225	0.48	0.769		0.01		1	1	0	2019	2019
Malignant neoplasm of kidney	C0740457	AR	367	P10275	androgen receptor	Nuclear receptor	854	0.351	0.846	0.98837	0.01		1	1	0	2004	2004
Malignant neoplasm of kidney	C0740457	ISG20	3669	Q96AZ6	interferon stimulated exonuclease gene 20		414	0.414	0.846	0.002899	0.01		1	1	0	2006	2006
Malignant neoplasm of kidney	C0740457	PDX1	3651	P52945	pancreatic and duodenal homeobox 1		185	0.53	0.654	0.017775	0.01		1	1	0	2005	2005
Malignant neoplasm of kidney	C0740457	IFI27	3429	P40305	interferon alpha inducible protein 27		332	0.437	0.769	0.010698	0.01		1	1	0	2011	2011
Malignant neoplasm of kidney	C0740457	IFNG	3458	P01579	interferon gamma		1519	0.288	0.962	0.47156	0.01		1	1	0	1992	1992
Malignant neoplasm of kidney	C0740457	IGF1R	3480	P08069	insulin like growth factor 1 receptor	Kinase	556	0.399	0.885	0.96799	0.01		1	1	0	2009	2009
Malignant neoplasm of kidney	C0740457	LINC01193	348120		long intergenic non-protein coding RNA 1193		91	0.565	0.692		0.01		1	1	0	2007	2007
Malignant neoplasm of kidney	C0740457	IGFBP3	3486	P17936	insulin like growth factor binding protein 3	Enzyme modulator	350	0.439	0.808	0.91029	0.01		1	1	0	1991	1991
Malignant neoplasm of kidney	C0740457	IGFBP7	3490	Q16270	insulin like growth factor binding protein 7		241	0.476	0.769	0.0012873	0.01		1	1	0	2009	2009
Malignant neoplasm of kidney	C0740457	APOH	350	P02749	apolipoprotein H		121	0.563	0.769	1.5614e-15	0.01		1	1	0	2018	2018
Malignant neoplasm of kidney	C0740457	TICAM2	353376	Q86XR7;Q9Y3B3	toll like receptor adaptor molecule 2		332	0.438	0.769	0.0025936	0.01		1	1	0	2011	2011
Malignant neoplasm of kidney	C0740457	IL2RA	3559	P01589	interleukin 2 receptor subunit alpha	Receptor	540	0.389	0.885	0.054709	0.01		1	1	0	2006	2006
Malignant neoplasm of kidney	C0740457	IL7	3574	P13232	interleukin 7		275	0.464	0.808	0.92574	0.01		1	1	0	1999	1999
Malignant neoplasm of kidney	C0740457	CXCL8	3576	P10145	C-X-C motif chemokine ligand 8	Signaling	1254	0.31	0.962	0.00027377	0.01		1	1	0	2019	2019
Malignant neoplasm of kidney	C0740457	IL13	3596	P35225	interleukin 13		587	0.386	0.846	0.014426	0.01		1	1	0	2012	2012
Malignant neoplasm of kidney	C0740457	IL15	3600	P40933	interleukin 15		426	0.422	0.846	0.70859	0.01		1	1	0	1999	1999
Malignant neoplasm of kidney	C0740457	IL18	3606	Q14116	interleukin 18		750	0.365	0.923	0.030717	0.01		1	1	0	2010	2010
Malignant neoplasm of kidney	C0740457	INSRR	3645	P14616	insulin receptor related receptor	Kinase	186	0.508	0.808	5.3976e-24	0.01		1	1	0	2019	2019
Malignant neoplasm of kidney	C0740457	MIR133A2	406923		microRNA 133a-2		8	0.805	0.269		0.01		1	1	0	2019	2019
